# Supplementary material for: Nanocapillary sampling coupled to liquid chromatography mass spectrometry delivers single cell drug measurement and lipid fingerprints
Source: Analyst. 2023 Jan 27;148(5):1041–9. doi: 10.1039/d2an01732f (PMC9969958; doi:10.1039/d2an01732f)
Supplement: AN-148-D2AN01732F-s001 [file AN-148-D2AN01732F-s001.xlsx]

## Sheet: CellExtraction_1
LipidIon	Class	FattyAcid	Ion	Formula	ObsMz	CalcMz	Delta(Da)	Delta(PPM)	Area
ChE(30:0)+NH4	ChE	(30:0)	M+NH4	C57 H108 O2 N1	838.839	838.837	0.00139918	1.66799	15930000
DG(10:1e_11:4)+H	DG	(10:1e_11:4)	M+H	C24 H39 O4	391.284	391.284	5.253e-05	0.13425	13210000
DG(10:1e_11:4)+Na	DG	(10:1e_11:4)	M+Na	C24 H38 O4 Na1	413.267	413.266	0.000464669	1.12438	26840000
DG(11:0_12:3)+Li	DG	(11:0_12:3)	M+Li	C26 H44 O5 Li1	443.335	443.334	0.000411385	0.927932	8872000
DG(12:0e_11:2)+Na	DG	(12:0e_11:2)	M+Na	C26 H48 O4 Na1	447.346	447.344	0.00114353	2.55625	6454000
DG(12:1e_11:4)+H	DG	(12:1e_11:4)	M+H	C26 H43 O4	419.316	419.316	0.000314962	0.751131	13750000
DG(12:1e_11:4)+Na	DG	(12:1e_11:4)	M+Na	C26 H42 O4 Na1	441.297	441.298	-7.247e-05	-0.16422	24350000
DG(14:1e_11:4)+H	DG	(14:1e_11:4)	M+H	C28 H47 O4	447.347	447.347	-0.000377721	-0.844358	10710000
DG(14:1e_11:4)+Na	DG	(14:1e_11:4)	M+Na	C28 H46 O4 Na1	469.329	469.329	0.00032653	0.695737	49240000
DG(4:0_18:3)+Li	DG	(4:0_18:3)	M+Li	C25 H42 O5 Li1	429.319	429.319	0.00032353	0.753588	2141000
FA(14:0)+H	FA	(14:0)	M+H	O2 H29 C14	229.216	229.216	-0.00013447	-0.58665	42890
FA(18:3e)+H	FA	(18:3e)	M+H	O1 H33 C18	265.252	265.253	-0.00063847	-2.40703	913900
MG(14:0e)+Na	MG	(14:0e)	M+Na	C17 H36 O3 Na1	311.256	311.256	0.00022053	0.708515	1670000
MG(14:1)+H	MG	(14:1)	M+H	C17 H33 O4	301.238	301.237	0.000430903	1.43044	344500
MG(19:1)+H	MG	(19:1)	M+H	C22 H43 O4	371.316	371.316	0.00056153	1.51227	7527000
MG(19:1)+Na	MG	(19:1)	M+Na	C22 H42 O4 Na1	393.298	393.298	0.000454461	1.15551	69570000
MG(22:4)+Li	MG	(22:4)	M+Li	C25 H42 O4 Li1	413.324	413.324	0.000344216	0.832798	4469000
MG(8:0e)+Li	MG	(8:0e)	M+Li	C11 H24 O3 Li1	211.188	211.188	0.00049353	2.33691	232600
MG(9:0)+Na	MG	(9:0)	M+Na	C12 H24 O4 Na1	255.156	255.157	-0.00026047	-1.02082	91410
PE(28:0_24:2)+Li	PE	(28:0_24:2)	M+Li	C57 H110 O8 N1 P1 Li1	974.814	974.812	0.00134724	1.38205	9181000
PS(34:0_20:4)+Li	PS	(34:0_20:4)	M+Li	C60 H110 O10 N1 P1 Li1	1042.8	1042.8	-0.00165947	-1.59136	7119000

## Sheet: CellExtraction_2
LipidIon	Class	FattyAcid	Ion	Formula	ObsMz	CalcMz	Delta(Da)	Delta(PPM)	Area
Cer(m17:0_22:0)+Na	Cer	(m17:0_22:0)	M+Na	C39 H79 O2 N1 Na1	616.599	616.6	-0.00102647	-1.66473	486000
ChE(30:0)+NH4	ChE	(30:0)	M+NH4	C57 H108 O2 N1	838.839	838.837	0.001054	1.25649	22360000
DG(10:0_11:3)+Li	DG	(10:0_11:3)	M+Li	C24 H40 O5 Li1	415.303	415.303	0.000425031	1.02342	819000
DG(10:0_11:4)+H	DG	(10:0_11:4)	M+H	C24 H39 O5	407.28	407.279	0.00049153	1.20686	4333000
DG(10:0e_11:4)+H	DG	(10:0e_11:4)	M+H	C24 H41 O4	393.298	393.3	-0.0018975	-4.82459	19530000
DG(10:0e_11:4)+Li	DG	(10:0e_11:4)	M+Li	C24 H40 O4 Li1	399.309	399.308	0.00041354	1.03564	6794000
DG(10:1e_11:4)+H	DG	(10:1e_11:4)	M+H	C24 H39 O4	391.285	391.284	0.00033753	0.862619	15530000
DG(10:1e_11:4)+Na	DG	(10:1e_11:4)	M+Na	C24 H38 O4 Na1	413.267	413.266	0.000314058	0.759939	22400000
DG(11:0_12:3)+Li	DG	(11:0_12:3)	M+Li	C26 H44 O5 Li1	443.335	443.334	0.000244301	0.551052	8913000
DG(12:0e_11:2)+Na	DG	(12:0e_11:2)	M+Na	C26 H48 O4 Na1	447.346	447.344	0.00107545	2.40407	1376000
DG(12:1e_11:4)+H	DG	(12:1e_11:4)	M+H	C26 H43 O4	419.316	419.316	0.000154285	0.367944	5365000
DG(12:1e_11:4)+Na	DG	(12:1e_11:4)	M+Na	C26 H42 O4 Na1	441.298	441.298	0.000297025	0.673072	51470000
DG(14:1e_11:4)+H	DG	(14:1e_11:4)	M+H	C28 H47 O4	447.346	447.347	-0.000564329	-1.2615	20070000
DG(14:1e_11:4)+Na	DG	(14:1e_11:4)	M+Na	C28 H46 O4 Na1	469.329	469.329	0.000282416	0.601743	48640000
DG(20:2e_23:0)+NH4	DG	(20:2e_23:0)	M+NH4	C46 H92 O4 N1	722.704	722.702	0.00183078	2.53323	902000
DG(4:0_10:3)+H	DG	(4:0_10:3)	M+H	C17 H27 O5	311.186	311.185	0.000287153	0.92277	3467000
DG(4:0_11:3)+Li	DG	(4:0_11:3)	M+Li	C18 H28 O5 Li1	331.209	331.209	0.00025553	0.771505	5663000
DG(4:0_17:1)+H	DG	(4:0_17:1)	M+H	C24 H45 O5	413.324	413.326	-0.00202237	-4.89294	2031000
DG(4:0_18:3)+Li	DG	(4:0_18:3)	M+Li	C25 H42 O5 Li1	429.319	429.319	0.000316512	0.737241	4444000
DG(8:0_11:1)+H	DG	(8:0_11:1)	M+H	C22 H41 O5	385.293	385.295	-0.00179478	-4.65822	3383000
DG(8:0e_11:2)+Li	DG	(8:0e_11:2)	M+Li	C22 H40 O4 Li1	375.307	375.308	-0.00078447	-2.0902	515100
DG(8:1e_11:4)+NH4	DG	(8:1e_11:4)	M+NH4	C22 H38 O4 N1	380.278	380.28	-0.00183547	-4.82665	3499000
DG(8:1e_17:1)+NH4	DG	(8:1e_17:1)	M+NH4	C28 H56 O4 N1	470.421	470.42	0.000321552	0.683542	1900000
DG(8:1e_18:3)+Li	DG	(8:1e_18:3)	M+Li	C29 H50 O4 Li1	469.386	469.386	-0.000328409	-0.699656	786100
FA(18:3e)+H	FA	(18:3e)	M+H	O1 H33 C18	265.252	265.253	-0.00012147	-0.45794	4225000
LPA(10:0)+H	LPA	(10:0)	M+H	C13 H28 O7 N0 P1	327.157	327.157	0.000503022	1.53755	861400
LPC(10:1e)+Li	LPC	(10:1e)	M+Li	C18 H38 O6 N1 P1 Li1	402.259	402.259	-0.000145788	-0.362422	258000
MG(14:0e)+Na	MG	(14:0e)	M+Na	C17 H36 O3 Na1	311.256	311.256	0.000389747	1.25217	4001000
MG(14:1)+H	MG	(14:1)	M+H	C17 H33 O4	301.238	301.237	0.000342008	1.13534	4624000
MG(18:2)+H	MG	(18:2)	M+H	C21 H39 O4	355.283	355.284	-0.00143047	-4.02628	6284000
MG(18:4)+Li	MG	(18:4)	M+Li	C21 H34 O4 Li1	357.262	357.261	0.000407827	1.14154	1180000
MG(19:1)+H	MG	(19:1)	M+H	C22 H43 O4	371.316	371.316	0.000567713	1.52892	94650000
MG(19:1)+K	MG	(19:1)	M+K	C22 H42 O4 K1	409.272	409.271	0.000464258	1.13435	3772000
MG(19:1)+Na	MG	(19:1)	M+Na	C22 H42 O4 Na1	393.298	393.298	0.000230376	0.585755	460600000
MG(22:1)+NH4	MG	(22:1)	M+NH4	C25 H52 O4 N1	430.389	430.389	0.00019253	0.447339	2901000
MG(22:4)+Li	MG	(22:4)	M+Li	C25 H42 O4 Li1	413.324	413.324	0.000179352	0.433926	4482000
MG(22:6)+Li	MG	(22:6)	M+Li	C25 H38 O4 Li1	409.293	409.292	0.000332609	0.812642	1623000
MG(6:0)+Na	MG	(6:0)	M+Na	C9 H18 O4 Na1	213.109	213.11	-0.000255919	-1.20088	3178000
MG(8:0e)+Li	MG	(8:0e)	M+Li	C11 H24 O3 Li1	211.188	211.188	0.00048653	2.30377	503500
MG(8:1e)+Li	MG	(8:1e)	M+Li	C11 H22 O3 Li1	209.173	209.172	0.000420722	2.01136	212500
MG(9:0)+Na	MG	(9:0)	M+Na	C12 H24 O4 Na1	255.156	255.157	-0.00041747	-1.63613	978500
OAHFA(12:0_12:0)+H	OAHFA	(12:0_12:0)	M+H	C24 H47 O4	399.347	399.347	0.00058553	1.46621	144400
OAHFA(20:0_38:4)+H	OAHFA	(20:0_38:4)	M+H	C58 H107 O4	867.816	867.816	-0.000151766	-0.174883	647900
PA(28:1_23:0)+NH4	PA	(28:1_23:0)	M+NH4	C54 H109 O8 N1 P1	930.79	930.789	0.00176253	1.89358	204000
PC(20:2e_23:0)+Li	PC	(20:2e_23:0)	M+Li	C51 H100 O7 N1 P1 Li1	876.739	876.739	-7.49329e-05	-0.0854676	1162000
PC(28:0_22:6)+K	PC	(28:0_22:6)	M+K	C58 H104 O8 N1 P1 K1	1012.72	1012.71	0.00228132	2.25267	757800
PC(33:1_18:2)+K	PC	(33:1_18:2)	M+K	C59 H112 O8 N1 P1 K1	1032.77	1032.78	-0.00418543	-4.05262	1841000
PE(28:0_24:2)+Li	PE	(28:0_24:2)	M+Li	C57 H110 O8 N1 P1 Li1	974.813	974.812	0.000905495	0.92889	12900000
PG(28:1_24:2)+Li	PG	(28:1_24:2)	M+Li	C58 H109 O10 N0 P1 Li1	1003.79	1003.79	0.00046192	0.460175	404400
PI(18:2e_23:0)+NH4	PI	(18:2e_23:0)	M+NH4	C50 H99 O12 N1 P1	936.695	936.69	0.00464653	4.96056	785700
PI(20:4e_11:4)+NH4	PI	(20:4e_11:4)	M+NH4	C40 H67 O12 N1 P1	784.439	784.44	-0.000575176	-0.733231	2168000
PS(31:1_22:6)+Li	PS	(31:1_22:6)	M+Li	C59 H102 O10 N1 P1 Li1	1022.74	1022.74	0.00317272	3.10217	1145000
PS(31:1_22:6)+Na	PS	(31:1_22:6)	M+Na	C59 H102 O10 N1 P1 Na1	1038.71	1038.71	0.00126953	1.22221	175400
PS(33:0_18:2)+H	PS	(33:0_18:2)	M+H	C57 H109 O10 N1 P1	998.779	998.778	0.00077453	0.775476	191300
PS(34:0_20:4)+Li	PS	(34:0_20:4)	M+Li	C60 H110 O10 N1 P1 Li1	1042.8	1042.8	-0.00165811	-1.59006	9979000
TG(12:0e_18:2_19:0)+NH4	TG	(12:0e_18:2_19:0)	M+NH4	C52 H102 O5 N1	820.778	820.775	0.00234053	2.8516	1422000
TG(15:0_22:6_22:6)+NH4	TG	(15:0_22:6_22:6)	M+NH4	C62 H100 O6 N1	954.758	954.755	0.00383653	4.01832	1493000
TG(16:0_18:2_22:1)+Na	TG	(16:0_18:2_22:1)	M+Na	C59 H108 O6 Na1	935.804	935.804	0.000527856	0.564067	399400
TG(16:1_12:0_18:2)+NH4	TG	(16:1_12:0_18:2)	M+NH4	C49 H92 O6 N1	790.691	790.692	-0.00092247	-1.16666	809900
TG(18:0e_18:2_18:2)+Li	TG	(18:0e_18:2_18:2)	M+Li	C57 H104 O5 Li1	875.805	875.804	0.000676844	0.772825	205500
TG(4:0_10:0_11:2)+Li	TG	(4:0_10:0_11:2)	M+Li	C28 H48 O6 Li1	487.361	487.361	0.000381141	0.782051	11330000
TG(4:0_6:0_12:0)+H	TG	(4:0_6:0_12:0)	M+H	C25 H47 O6	443.335	443.337	-0.00198647	-4.48074	2274000
TG(4:0_6:0_13:0)+H	TG	(4:0_6:0_13:0)	M+H	C26 H49 O6	457.35	457.352	-0.0020932	-4.57679	7221000

## Sheet: CellExtraction_3
LipidIon	Class	FattyAcid	Ion	Formula	ObsMz	CalcMz	Delta(Da)	Delta(PPM)	Area
Cer(m17:0_21:5)+NH4	Cer	(m17:0_21:5)	M+NH4	C38 H71 O2 N2	587.549	587.551	-0.00197847	-3.36732	6852000
ChE(30:0)+NH4	ChE	(30:0)	M+NH4	C57 H108 O2 N1	838.838	838.837	0.000908178	1.08266	16510000
DG(10:0_11:3)+Li	DG	(10:0_11:3)	M+Li	C24 H40 O5 Li1	415.303	415.303	6.98915e-05	0.16829	735500
DG(10:0e_11:4)+Li	DG	(10:0e_11:4)	M+Li	C24 H40 O4 Li1	399.308	399.308	0.000293344	0.734629	5641000
DG(10:1e_11:4)+H	DG	(10:1e_11:4)	M+H	C24 H39 O4	391.285	391.284	0.000299701	0.76594	12610000
DG(10:1e_11:4)+Na	DG	(10:1e_11:4)	M+Na	C24 H38 O4 Na1	413.267	413.266	0.000296491	0.717431	24260000
DG(10:1e_11:4)+NH4	DG	(10:1e_11:4)	M+NH4	C24 H42 O4 N1	408.309	408.311	-0.00196022	-4.80081	2488000
DG(11:0_12:3)+Li	DG	(11:0_12:3)	M+Li	C26 H44 O5 Li1	443.335	443.334	0.000209994	0.473668	9405000
DG(12:0e_11:2)+Na	DG	(12:0e_11:2)	M+Na	C26 H48 O4 Na1	447.346	447.344	0.00107353	2.39978	2252000
DG(12:1e_11:4)+H	DG	(12:1e_11:4)	M+H	C26 H43 O4	419.316	419.316	0.00018353	0.437689	13530000
DG(12:1e_11:4)+Na	DG	(12:1e_11:4)	M+Na	C26 H42 O4 Na1	441.298	441.298	0.00026553	0.601702	43460000
DG(14:1e_11:4)+H	DG	(14:1e_11:4)	M+H	C28 H47 O4	447.346	447.347	-0.000502084	-1.12236	16690000
DG(14:1e_11:4)+Na	DG	(14:1e_11:4)	M+Na	C28 H46 O4 Na1	469.329	469.329	0.000266969	0.568831	91130000
DG(4:0_10:3)+H	DG	(4:0_10:3)	M+H	C17 H27 O5	311.186	311.185	0.00031353	1.00753	1733000
DG(4:0_17:1)+H	DG	(4:0_17:1)	M+H	C24 H45 O5	413.327	413.326	0.00048453	1.17227	4427000
DG(4:0_18:3)+Li	DG	(4:0_18:3)	M+Li	C25 H42 O5 Li1	429.319	429.319	9.87197e-05	0.229945	4792000
DG(4:0_20:3)+Li	DG	(4:0_20:3)	M+Li	C27 H46 O5 Li1	457.35	457.35	0.000137412	0.300452	5757000
DG(8:0e_11:2)+Na	DG	(8:0e_11:2)	M+Na	C22 H40 O4 Na1	391.283	391.282	0.000673238	1.72059	-1
FA(18:3e)+H	FA	(18:3e)	M+H	O1 H33 C18	265.252	265.253	-0.000345829	-1.30377	2068000
LPG(10:0)+K	LPG	(10:0)	M+K	C16 H33 O9 N0 P1 K1	439.15	439.149	0.00077753	1.77053	1889000
LPG(9:0)+K	LPG	(9:0)	M+K	C15 H31 O9 N0 P1 K1	425.135	425.134	0.00118353	2.78389	1524000
MG(14:0e)+Na	MG	(14:0e)	M+Na	C17 H36 O3 Na1	311.256	311.256	0.000381377	1.22528	2251000
MG(14:1)+H	MG	(14:1)	M+H	C17 H33 O4	301.238	301.237	0.000370709	1.23062	2248000
MG(18:1)+NH4	MG	(18:1)	M+NH4	C21 H44 O4 N1	374.327	374.326	0.00057653	1.54017	506600
MG(18:2)+H	MG	(18:2)	M+H	C21 H39 O4	355.283	355.284	-0.00167647	-4.71869	1213000
MG(18:4)+Li	MG	(18:4)	M+Li	C21 H34 O4 Li1	357.261	357.261	0.000318844	0.892466	975200
MG(19:1)+H	MG	(19:1)	M+H	C22 H43 O4	371.316	371.316	0.000499239	1.34451	49400000
MG(19:1)+Na	MG	(19:1)	M+Na	C22 H42 O4 Na1	393.298	393.298	0.000407931	1.0372	267000000
MG(20:4)+Li	MG	(20:4)	M+Li	C23 H38 O4 Li1	385.293	385.292	0.00034752	0.901962	3022000
MG(22:4)+Li	MG	(22:4)	M+Li	C25 H42 O4 Li1	413.324	413.324	0.000299309	0.72415	4106000
MG(22:6)+Li	MG	(22:6)	M+Li	C25 H38 O4 Li1	409.293	409.292	8.8798e-05	0.216955	3728000
PC(16:0_18:1)+H	PC	(16:0_18:1)	M+H	C42 H83 O8 N1 P1	760.586	760.585	0.00065859	0.865898	5854000
PC(16:0_18:1)+Na	PC	(16:0_18:1)	M+Na	C42 H82 O8 N1 P1 Na1	782.566	782.567	-0.000652946	-0.834365	8073000
PE(28:0_24:2)+Li	PE	(28:0_24:2)	M+Li	C57 H110 O8 N1 P1 Li1	974.813	974.812	0.00098151	1.00687	9970000
PS(34:0_20:4)+Li	PS	(34:0_20:4)	M+Li	C60 H110 O10 N1 P1 Li1	1042.8	1042.8	-0.00144626	-1.3869	7684000
TG(4:0_10:0_11:2)+Li	TG	(4:0_10:0_11:2)	M+Li	C28 H48 O6 Li1	487.361	487.361	0.00060053	1.23221	4069000
TG(4:0_10:2_12:0)+Li	TG	(4:0_10:2_12:0)	M+Li	C29 H50 O6 Li1	501.376	501.376	-0.00022647	-0.451696	1734000

## Sheet: CellExtraction_4
LipidIon	Class	FattyAcid	Ion	Formula	ObsMz	CalcMz	Delta(Da)	Delta(PPM)	Area
Cer(t16:1_12:0)+H	Cer	(t16:1_12:0)	M+H	C28 H56 O4 N1	470.421	470.42	0.00025453	0.541068	1128000
ChE(30:0)+NH4	ChE	(30:0)	M+NH4	C57 H108 O2 N1	838.838	838.837	0.000918541	1.09501	26100000
DG(10:0e_11:4)+Li	DG	(10:0e_11:4)	M+Li	C24 H40 O4 Li1	399.308	399.308	0.000361861	0.906219	4944000
DG(10:1e_11:4)+H	DG	(10:1e_11:4)	M+H	C24 H39 O4	391.284	391.284	0.00011153	0.285035	11030000
DG(10:1e_11:4)+Na	DG	(10:1e_11:4)	M+Na	C24 H38 O4 Na1	413.267	413.266	0.000297784	0.72056	27950000
DG(10:1e_11:4)+NH4	DG	(10:1e_11:4)	M+NH4	C24 H42 O4 N1	408.309	408.311	-0.00194501	-4.76357	6591000
DG(11:0_12:3)+Li	DG	(11:0_12:3)	M+Li	C26 H44 O5 Li1	443.335	443.334	0.000262501	0.592106	7354000
DG(12:0e_11:2)+Na	DG	(12:0e_11:2)	M+Na	C26 H48 O4 Na1	447.345	447.344	0.00012553	0.280611	442600
DG(12:1e_11:4)+H	DG	(12:1e_11:4)	M+H	C26 H43 O4	419.316	419.316	0.00031553	0.752487	8412000
DG(12:1e_11:4)+K	DG	(12:1e_11:4)	M+K	C26 H42 O4 K1	457.272	457.271	0.00052153	1.14052	82450
DG(12:1e_11:4)+Na	DG	(12:1e_11:4)	M+Na	C26 H42 O4 Na1	441.298	441.298	0.00048716	1.10392	30420000
DG(14:1e_11:4)+H	DG	(14:1e_11:4)	M+H	C28 H47 O4	447.346	447.347	-0.000666332	-1.48952	18800000
DG(14:1e_11:4)+Na	DG	(14:1e_11:4)	M+Na	C28 H46 O4 Na1	469.329	469.329	0.00035621	0.758975	107500000
DG(4:0_10:3)+H	DG	(4:0_10:3)	M+H	C17 H27 O5	311.186	311.185	0.000423509	1.36095	1904000
DG(4:0_11:3)+Li	DG	(4:0_11:3)	M+Li	C18 H28 O5 Li1	331.209	331.209	0.00031053	0.937562	3402000
DG(4:0_15:0)+Na	DG	(4:0_15:0)	M+Na	C22 H42 O5 Na1	409.292	409.292	5.53e-06	0.0135111	3603000
DG(4:0_18:3)+Li	DG	(4:0_18:3)	M+Li	C25 H42 O5 Li1	429.319	429.319	-0.00012147	-0.282936	4631000
DG(4:0_20:3)+Li	DG	(4:0_20:3)	M+Li	C27 H46 O5 Li1	457.35	457.35	0.000292027	0.638518	5102000
DG(8:0_11:1)+Na	DG	(8:0_11:1)	M+Na	C22 H40 O5 Na1	407.277	407.277	0.00029453	0.723168	2624000
DG(8:0e_11:2)+Na	DG	(8:0e_11:2)	M+Na	C22 H40 O4 Na1	391.283	391.282	0.00081653	2.0868	10960000
FA(18:3e)+H	FA	(18:3e)	M+H	O1 H33 C18	265.252	265.253	-0.000158586	-0.597868	4373000
MG(14:0e)+Na	MG	(14:0e)	M+Na	C17 H36 O3 Na1	311.256	311.256	0.000282828	0.908664	2363000
MG(14:1)+H	MG	(14:1)	M+H	C17 H33 O4	301.238	301.237	0.000419587	1.39287	2474000
MG(18:4)+Li	MG	(18:4)	M+Li	C21 H34 O4 Li1	357.262	357.261	0.000577071	1.61526	855200
MG(19:1)+H	MG	(19:1)	M+H	C22 H43 O4	371.316	371.316	0.00051641	1.39075	53180000
MG(19:1)+K	MG	(19:1)	M+K	C22 H42 O4 K1	409.272	409.271	0.00052753	1.28895	2603000
MG(19:1)+Na	MG	(19:1)	M+Na	C22 H42 O4 Na1	393.298	393.298	0.000645962	1.64242	279300000
MG(20:0e)+Na	MG	(20:0e)	M+Na	C23 H48 O3 Na1	395.351	395.35	0.00102853	2.60156	1842000
MG(20:4)+Li	MG	(20:4)	M+Li	C23 H38 O4 Li1	385.293	385.292	0.000532554	1.3822	2318000
MG(22:4)+Li	MG	(22:4)	M+Li	C25 H42 O4 Li1	413.324	413.324	0.000457114	1.10594	5160000
MG(22:6)+Li	MG	(22:6)	M+Li	C25 H38 O4 Li1	409.293	409.292	0.000309433	0.756017	1844000
PC(33:1_18:2)+K	PC	(33:1_18:2)	M+K	C59 H112 O8 N1 P1 K1	1032.77	1032.78	-0.00395083	-3.82546	1896000
PE(28:0_24:2)+Li	PE	(28:0_24:2)	M+Li	C57 H110 O8 N1 P1 Li1	974.814	974.812	0.00126979	1.3026	15630000
PS(34:0_20:4)+Li	PS	(34:0_20:4)	M+Li	C60 H110 O10 N1 P1 Li1	1042.8	1042.8	-0.00130392	-1.2504	12420000
TG(15:0_22:6_22:6)+NH4	TG	(15:0_22:6_22:6)	M+NH4	C62 H100 O6 N1	954.757	954.755	0.0026853	2.81254	885600
TG(16:0_18:2_22:1)+Na	TG	(16:0_18:2_22:1)	M+Na	C59 H108 O6 Na1	935.804	935.804	-0.00023247	-0.248417	631700
TG(4:0_10:0_11:2)+Li	TG	(4:0_10:0_11:2)	M+Li	C28 H48 O6 Li1	487.361	487.361	0.000115295	0.236571	7523000

## Sheet: CellExtraction_5
LipidIon	Class	FattyAcid	Ion	Formula	ObsMz	CalcMz	Delta(Da)	Delta(PPM)	Area
Cer(m17:0_21:5)+NH4	Cer	(m17:0_21:5)	M+NH4	C38 H71 O2 N2	587.549	587.551	-0.00246047	-4.18768	6235000
Cer(m18:1_18:4)+NH4	Cer	(m18:1_18:4)	M+NH4	C36 H67 O2 N2	559.517	559.52	-0.00261047	-4.66557	6749000
ChE(30:0)+NH4	ChE	(30:0)	M+NH4	C57 H108 O2 N1	838.838	838.837	0.000403917	0.481519	23440000
DG(10:0_11:3)+Li	DG	(10:0_11:3)	M+Li	C24 H40 O5 Li1	415.303	415.303	0.000284992	0.686225	851000
DG(10:0e_11:4)+H	DG	(10:0e_11:4)	M+H	C24 H41 O4	393.298	393.3	-0.00166847	-4.24225	5210000
DG(10:0e_11:4)+Li	DG	(10:0e_11:4)	M+Li	C24 H40 O4 Li1	399.308	399.308	0.000230126	0.576311	8750000
DG(10:1e_11:4)+H	DG	(10:1e_11:4)	M+H	C24 H39 O4	391.285	391.284	0.000390651	0.998378	12070000
DG(10:1e_11:4)+Na	DG	(10:1e_11:4)	M+Na	C24 H38 O4 Na1	413.266	413.266	0.000261439	0.632616	17170000
DG(10:1e_11:4)+NH4	DG	(10:1e_11:4)	M+NH4	C24 H42 O4 N1	408.309	408.311	-0.00200527	-4.91115	13550000
DG(11:0_12:3)+Li	DG	(11:0_12:3)	M+Li	C26 H44 O5 Li1	443.334	443.334	-6.947e-05	-0.156699	12830000
DG(12:0e_11:2)+Na	DG	(12:0e_11:2)	M+Na	C26 H48 O4 Na1	447.346	447.344	0.00151118	3.37811	9132000
DG(12:1e_11:4)+H	DG	(12:1e_11:4)	M+H	C26 H43 O4	419.316	419.316	0.00042853	1.02197	11570000
DG(12:1e_11:4)+Na	DG	(12:1e_11:4)	M+Na	C26 H42 O4 Na1	441.298	441.298	0.000344511	0.780675	14550000
DG(14:1e_11:4)+H	DG	(14:1e_11:4)	M+H	C28 H47 O4	447.346	447.347	-0.000455573	-1.01839	10450000
DG(14:1e_11:4)+Na	DG	(14:1e_11:4)	M+Na	C28 H46 O4 Na1	469.329	469.329	0.000427413	0.910688	88360000
DG(4:0_10:3)+H	DG	(4:0_10:3)	M+H	C17 H27 O5	311.186	311.185	0.000213373	0.685678	2508000
DG(4:0_11:3)+Li	DG	(4:0_11:3)	M+Li	C18 H28 O5 Li1	331.209	331.209	7.953e-05	0.24012	2589000
DG(4:0_17:1)+H	DG	(4:0_17:1)	M+H	C24 H45 O5	413.324	413.326	-0.00200546	-4.85203	2063000
DG(4:0_18:3)+Li	DG	(4:0_18:3)	M+Li	C25 H42 O5 Li1	429.319	429.319	0.00016118	0.375432	5264000
DG(4:0_20:3)+Li	DG	(4:0_20:3)	M+Li	C27 H46 O5 Li1	457.35	457.35	0.000267967	0.585911	7730000
DG(8:0e_11:2)+Na	DG	(8:0e_11:2)	M+Na	C22 H40 O4 Na1	391.284	391.282	0.00193866	4.9546	12070000
FA(14:0)+H	FA	(14:0)	M+H	O2 H29 C14	229.216	229.216	-0.00030347	-1.32395	17510
FA(18:3e)+H	FA	(18:3e)	M+H	O1 H33 C18	265.252	265.253	-0.00025147	-0.948039	1111000
LPC(12:0)+Li	LPC	(12:0)	M+Li	C20 H42 O7 N1 P1 Li1	446.285	446.285	-2.447e-05	-0.0548303	1458000
LPE(14:1e)+Li	LPE	(14:1e)	M+Li	C19 H40 O6 N1 P1 Li1	416.275	416.275	6.253e-05	0.150213	1591000
LPG(9:0)+K	LPG	(9:0)	M+K	C15 H31 O9 N0 P1 K1	425.135	425.134	0.00124686	2.93285	1826000
MG(14:0)+Na	MG	(14:0)	M+Na	C17 H34 O4 Na1	325.236	325.235	0.00090753	2.79037	10640
MG(14:0e)+Na	MG	(14:0e)	M+Na	C17 H36 O3 Na1	311.256	311.256	0.000234645	0.753863	3726000
MG(14:1)+H	MG	(14:1)	M+H	C17 H33 O4	301.238	301.237	0.00033053	1.09724	250100
MG(16:0e)+Na	MG	(16:0e)	M+Na	C19 H40 O3 Na1	339.288	339.287	0.00056153	1.65502	303000
MG(18:4)+Li	MG	(18:4)	M+Li	C21 H34 O4 Li1	357.261	357.261	0.000295935	0.828342	1304000
MG(19:1)+H	MG	(19:1)	M+H	C22 H43 O4	371.316	371.316	0.00019653	0.529279	5410000
MG(19:1)+Na	MG	(19:1)	M+Na	C22 H42 O4 Na1	393.298	393.298	0.000396825	1.00897	40940000
MG(20:4)+Li	MG	(20:4)	M+Li	C23 H38 O4 Li1	385.293	385.292	0.000351263	0.911676	3795000
MG(22:4)+Li	MG	(22:4)	M+Li	C25 H42 O4 Li1	413.324	413.324	0.000219302	0.53058	5450000
MG(8:0e)+Li	MG	(8:0e)	M+Li	C11 H24 O3 Li1	211.188	211.188	0.000422807	2.00203	459400
MG(9:0)+Na	MG	(9:0)	M+Na	C12 H24 O4 Na1	255.157	255.157	7.153e-05	0.280337	720000
PC(4:0_10:2)+H	PC	(4:0_10:2)	M+H	C22 H41 O8 N1 P1	478.257	478.256	0.00078453	1.64039	24140000
PE(28:0_24:2)+Li	PE	(28:0_24:2)	M+Li	C57 H110 O8 N1 P1 Li1	974.813	974.812	0.000604633	0.620255	13970000
PS(34:0_20:4)+Li	PS	(34:0_20:4)	M+Li	C60 H110 O10 N1 P1 Li1	1042.8	1042.8	-0.00211347	-2.02672	10850000
PS(6:0_11:4)+K	PS	(6:0_11:4)	M+K	C23 H36 O10 N1 P1 K1	556.168	556.171	-0.00269174	-4.83979	169400000
SM(d18:2_17:1)+K	SM	(d18:2_17:1)	M+K	C40 H77 O6 N2 P1 K1	751.518	751.515	0.00280453	3.73182	3604000
TG(4:0_10:0_11:2)+Li	TG	(4:0_10:0_11:2)	M+Li	C28 H48 O6 Li1	487.361	487.361	0.000185058	0.379715	12150000
TG(4:0_10:1_11:4)+H	TG	(4:0_10:1_11:4)	M+H	C28 H43 O6	475.306	475.305	0.000457462	0.962457	1862000
TG(4:0_6:0_11:0)+H	TG	(4:0_6:0_11:0)	M+H	C24 H45 O6	429.319	429.321	-0.00201947	-4.70388	235600
TG(4:0_6:0_12:0)+H	TG	(4:0_6:0_12:0)	M+H	C25 H47 O6	443.335	443.337	-0.00215302	-4.85642	4511000
TG(4:0_6:0_14:2)+Li	TG	(4:0_6:0_14:2)	M+Li	C27 H46 O6 Li1	473.345	473.345	0.000181007	0.3824	5960000

## Sheet: CellExtraction_6
LipidIon	Class	FattyAcid	Ion	Formula	ObsMz	CalcMz	Delta(Da)	Delta(PPM)	Area
Cer(d20:1_26:6)+H	Cer	(d20:1_26:6)	M+H	C46 H80 O3 N1	694.615	694.613	0.00127553	1.83631	799300
Cer(d24:0_26:0)+H-H2O	Cer	(d24:0_26:0)	M+H-H2O	C50 H100 O2 N1	746.778	746.775	0.00328553	4.3996	110100
Cer(d24:0_26:1)+H-H2O	Cer	(d24:0_26:1)	M+H-H2O	C50 H98 O2 N1	744.76	744.759	0.00040253	0.540483	656900
Cer(m17:0_22:0)+Na	Cer	(m17:0_22:0)	M+Na	C39 H79 O2 N1 Na1	616.599	616.6	-0.00152947	-2.48049	1123000
Cer(m17:0_23:0+O)+H	Cer	(m17:0_23:0+O)	M+H	C40 H82 O3 N1	624.63	624.629	0.00104676	1.6758	907700
Cer(m18:0_26:0)+H-H2O	Cer	(m18:0_26:0)	M+H-H2O	C44 H88 O1 N1	646.685	646.686	-0.00108438	-1.67682	1249000
Cer(m18:0_26:2)+H	Cer	(m18:0_26:2)	M+H	C44 H86 O2 N1	660.663	660.665	-0.00251847	-3.81203	506300
Cer(m18:1_18:4)+NH4	Cer	(m18:1_18:4)	M+NH4	C36 H67 O2 N2	559.517	559.52	-0.00273047	-4.88004	6520000
Cer(m19:1_26:0+O)+Na	Cer	(m19:1_26:0+O)	M+Na	C45 H89 O3 N1 Na1	714.672	714.673	-0.00118942	-1.66429	1257000
Cer(m21:1_26:0+O)+NH4	Cer	(m21:1_26:0+O)	M+NH4	C47 H97 O3 N2	737.749	737.749	-0.00022847	-0.309685	113400
Cer(m22:0_26:5)+H	Cer	(m22:0_26:5)	M+H	C48 H88 O2 N1	710.679	710.681	-0.0022876	-3.21889	693700
Cer(t18:1_23:5)+Na	Cer	(t18:1_23:5)	M+Na	C41 H71 O4 N1 Na1	664.528	664.528	0.000846281	1.2735	4221000
Cer(t20:0_18:2+2O)+Na	Cer	(t20:0_18:2+2O)	M+Na	C38 H73 O6 N1 Na1	662.531	662.533	-0.00183859	-2.7751	2317000
ChE(30:0)+NH4	ChE	(30:0)	M+NH4	C57 H108 O2 N1	838.838	838.837	0.000702935	0.837986	19870000
DG(10:0_11:3)+Li	DG	(10:0_11:3)	M+Li	C24 H40 O5 Li1	415.303	415.303	0.000236237	0.568829	820700
DG(10:0e_11:4)+H	DG	(10:0e_11:4)	M+H	C24 H41 O4	393.298	393.3	-0.00179447	-4.56261	15710000
DG(10:0e_11:4)+Li	DG	(10:0e_11:4)	M+Li	C24 H40 O4 Li1	399.308	399.308	0.000362699	0.908317	10140000
DG(10:1e_11:4)+H	DG	(10:1e_11:4)	M+H	C24 H39 O4	391.285	391.284	0.00047453	1.21275	18340000
DG(10:1e_11:4)+K	DG	(10:1e_11:4)	M+K	C24 H38 O4 K1	429.241	429.24	0.00090853	2.11659	1104000
DG(10:1e_11:4)+Na	DG	(10:1e_11:4)	M+Na	C24 H38 O4 Na1	413.267	413.266	0.00033746	0.816566	17890000
DG(10:1e_11:4)+NH4	DG	(10:1e_11:4)	M+NH4	C24 H42 O4 N1	408.309	408.311	-0.00202403	-4.9571	7622000
DG(11:0_12:3)+Li	DG	(11:0_12:3)	M+Li	C26 H44 O5 Li1	443.334	443.334	0.000151077	0.340773	12060000
DG(12:0e_11:2)+Na	DG	(12:0e_11:2)	M+Na	C26 H48 O4 Na1	447.346	447.344	0.00161913	3.6194	16180000
DG(12:1e_11:4)+H	DG	(12:1e_11:4)	M+H	C26 H43 O4	419.316	419.316	5.653e-05	0.134815	6425000
DG(12:1e_11:4)+Na	DG	(12:1e_11:4)	M+Na	C26 H42 O4 Na1	441.298	441.298	0.000323955	0.734096	37300000
DG(14:1e_11:4)+H	DG	(14:1e_11:4)	M+H	C28 H47 O4	447.346	447.347	-0.00070547	-1.57701	457700
DG(14:1e_11:4)+Na	DG	(14:1e_11:4)	M+Na	C28 H46 O4 Na1	469.329	469.329	0.000491932	1.04816	93430000
DG(16:1_24:2)+NH4	DG	(16:1_24:2)	M+NH4	C43 H82 O5 N1	692.618	692.619	-0.000963392	-1.39094	789300
DG(20:2e_23:0)+NH4	DG	(20:2e_23:0)	M+NH4	C46 H92 O4 N1	722.704	722.702	0.00184514	2.55311	1851000
DG(28:0_23:0)+Na	DG	(28:0_23:0)	M+Na	C54 H106 O5 Na1	857.789	857.793	-0.00411462	-4.79677	176000
DG(4:0_10:3)+H	DG	(4:0_10:3)	M+H	C17 H27 O5	311.186	311.185	0.000388786	1.24937	1692000
DG(4:0_11:3)+Li	DG	(4:0_11:3)	M+Li	C18 H28 O5 Li1	331.21	331.209	0.00058153	1.75577	2735000
DG(4:0_16:1)+H	DG	(4:0_16:1)	M+H	C23 H43 O5	399.309	399.311	-0.00191677	-4.80022	10140000
DG(4:0_17:1)+H	DG	(4:0_17:1)	M+H	C24 H45 O5	413.324	413.326	-0.00201888	-4.88449	5526000
DG(4:0_18:3)+Li	DG	(4:0_18:3)	M+Li	C25 H42 O5 Li1	429.319	429.319	0.00036453	0.849088	6053000
DG(4:0_20:3)+Li	DG	(4:0_20:3)	M+Li	C27 H46 O5 Li1	457.35	457.35	0.00034622	0.757012	8707000
DG(8:0_11:1)+H	DG	(8:0_11:1)	M+H	C22 H41 O5	385.293	385.295	-0.00179886	-4.66879	4519000
DG(8:0e_11:2)+Li	DG	(8:0e_11:2)	M+Li	C22 H40 O4 Li1	375.307	375.308	-0.00121874	-3.2473	692500
DG(8:0e_11:2)+Na	DG	(8:0e_11:2)	M+Na	C22 H40 O4 Na1	391.282	391.282	0.00059853	1.52966	10420000
DG(8:1e_13:0)+Na	DG	(8:1e_13:0)	M+Na	C24 H46 O4 Na1	421.329	421.329	0.000231722	0.549978	271800
LPA(10:0)+H	LPA	(10:0)	M+H	C13 H28 O7 N0 P1	327.157	327.157	0.00020453	0.625173	359900
LPC(10:1e)+Li	LPC	(10:1e)	M+Li	C18 H38 O6 N1 P1 Li1	402.259	402.259	0.00012153	0.302118	1909000
LPE(14:1e)+Li	LPE	(14:1e)	M+Li	C19 H40 O6 N1 P1 Li1	416.275	416.275	8.653e-05	0.207867	1725000
MG(14:0e)+Na	MG	(14:0e)	M+Na	C17 H36 O3 Na1	311.256	311.256	0.000370496	1.19032	6827000
MG(16:0e)+Na	MG	(16:0e)	M+Na	C19 H40 O3 Na1	339.287	339.287	0.000433253	1.27695	817100
MG(18:4)+Li	MG	(18:4)	M+Li	C21 H34 O4 Li1	357.262	357.261	0.000358105	1.00236	1382000
MG(19:1)+Na	MG	(19:1)	M+Na	C22 H42 O4 Na1	393.298	393.298	0.000640205	1.62778	14550000
MG(20:4)+Li	MG	(20:4)	M+Li	C23 H38 O4 Li1	385.293	385.292	0.00030353	0.787789	4519000
MG(22:4)+Li	MG	(22:4)	M+Li	C25 H42 O4 Li1	413.324	413.324	0.000255006	0.616962	5526000
MG(8:1e)+Li	MG	(8:1e)	M+Li	C11 H22 O3 Li1	209.173	209.172	0.00074353	3.55461	87340
MG(9:0)+Na	MG	(9:0)	M+Na	C12 H24 O4 Na1	255.156	255.157	-0.00058247	-2.28279	717200
OAHFA(12:0_12:0)+H	OAHFA	(12:0_12:0)	M+H	C24 H47 O4	399.348	399.347	0.00086453	2.16485	114000
OAHFA(20:0_38:4)+H	OAHFA	(20:0_38:4)	M+H	C58 H107 O4	867.817	867.816	0.000156665	0.180528	524500
PA(18:0e_23:0)+NH4	PA	(18:0e_23:0)	M+NH4	C44 H93 O7 N1 P1	778.668	778.668	-0.00089947	-1.15514	594000
PA(24:0_23:0)+NH4	PA	(24:0_23:0)	M+NH4	C50 H103 O8 N1 P1	876.739	876.742	-0.00290795	-3.31678	1359000
PA(31:1_22:6)+NH4	PA	(31:1_22:6)	M+NH4	C56 H101 O8 N1 P1	946.724	946.726	-0.00195038	-2.06014	1076000
PC(22:0_24:0)+H	PC	(22:0_24:0)	M+H	C54 H109 O8 N1 P1	930.791	930.789	0.00223953	2.40605	231200
PC(26:0_22:1)+K	PC	(26:0_22:1)	M+K	C56 H110 O8 N1 P1 K1	994.762	994.76	0.00239553	2.40814	149200
PC(33:1_18:2)+K	PC	(33:1_18:2)	M+K	C59 H112 O8 N1 P1 K1	1032.77	1032.78	-0.00416211	-4.03004	1556000
PE(16:0e_23:0)+Li	PE	(16:0e_23:0)	M+Li	C44 H90 O7 N1 P1 Li1	782.66	782.661	-0.00048547	-0.620281	954400
PE(20:0_24:2)+H	PE	(20:0_24:2)	M+H	C49 H95 O8 N1 P1	856.681	856.679	0.0019175	2.23829	705200
PE(20:3e_23:0)+Na	PE	(20:3e_23:0)	M+Na	C48 H92 O7 N1 P1 Na1	848.649	848.65	-0.000939232	-1.10674	1075000
PE(22:0_23:0)+Li	PE	(22:0_23:0)	M+Li	C50 H100 O8 N1 P1 Li1	880.737	880.734	0.00324153	3.68047	378000
PE(28:0_24:2)+Li	PE	(28:0_24:2)	M+Li	C57 H110 O8 N1 P1 Li1	974.813	974.812	0.000883263	0.906084	11480000
PE(31:0_22:6)+K	PE	(31:0_22:6)	M+K	C58 H104 O8 N1 P1 K1	1012.71	1012.71	0.00113082	1.11663	687500
PE(31:1_18:2)+K	PE	(31:1_18:2)	M+K	C54 H102 O8 N1 P1 K1	962.699	962.697	0.00154453	1.60437	206400
PG(20:0_24:1)+NH4	PG	(20:0_24:1)	M+NH4	C50 H101 O10 N1 P1	906.717	906.716	0.00136953	1.51043	107400
PG(22:0_23:0)+Li	PG	(22:0_23:0)	M+Li	C51 H101 O10 N0 P1 Li1	911.731	911.729	0.00273253	2.99708	142300
PG(28:1_24:2)+Li	PG	(28:1_24:2)	M+Li	C58 H109 O10 N0 P1 Li1	1003.79	1003.79	-0.00183647	-1.82954	270600
PI(16:0_11:4)+K	PI	(16:0_11:4)	M+K	C36 H61 O13 N0 P1 K1	771.35	771.348	0.00183053	2.37315	754200
PI(16:0_23:0)+NH4	PI	(16:0_23:0)	M+NH4	C48 H97 O13 N1 P1	926.666	926.669	-0.00328046	-3.54007	943900
PI(20:0e_22:6)+NH4	PI	(20:0e_22:6)	M+NH4	C51 H93 O12 N1 P1	942.642	942.643	-0.00139247	-1.4772	206000
PI(20:1_18:2)+NH4	PI	(20:1_18:2)	M+NH4	C47 H89 O13 N1 P1	906.608	906.607	0.00150138	1.65604	706000
PI(20:4e_11:4)+NH4	PI	(20:4e_11:4)	M+NH4	C40 H67 O12 N1 P1	784.438	784.44	-0.00134547	-1.7152	4211000
PI(32:1_22:6)+H	PI	(32:1_22:6)	M+H	C63 H110 O13 N0 P1	1105.77	1105.77	0.00524553	4.74376	208900
PS(20:0e_24:1)+Li	PS	(20:0e_24:1)	M+Li	C50 H98 O9 N1 P1 Li1	894.714	894.713	0.00055153	0.616431	172000
PS(22:5_23:0)+Li	PS	(22:5_23:0)	M+Li	C51 H90 O10 N1 P1 Li1	914.642	914.646	-0.00393747	-4.30493	329500
PS(24:1_23:0)+H	PS	(24:1_23:0)	M+H	C53 H103 O10 N1 P1	944.734	944.731	0.00219653	2.32502	844200
PS(24:1_23:0)+Li	PS	(24:1_23:0)	M+Li	C53 H102 O10 N1 P1 Li1	950.739	950.74	-0.00016447	-0.172992	136800
PS(26:0_20:4)+H	PS	(26:0_20:4)	M+H	C52 H95 O10 N1 P1	924.668	924.669	-0.000560115	-0.605746	514300
PS(31:1_20:4)+Na	PS	(31:1_20:4)	M+Na	C57 H102 O10 N1 P1 Na1	1014.71	1014.71	-0.00148947	-1.46787	825000
PS(31:1_22:6)+Li	PS	(31:1_22:6)	M+Li	C59 H102 O10 N1 P1 Li1	1022.74	1022.74	0.00363993	3.55899	970200
PS(33:0_18:2)+H	PS	(33:0_18:2)	M+H	C57 H109 O10 N1 P1	998.777	998.778	-0.0011129	-1.11426	224800
PS(34:0_20:4)+Li	PS	(34:0_20:4)	M+Li	C60 H110 O10 N1 P1 Li1	1042.8	1042.8	-0.00146542	-1.40527	9511000
SM(d18:2_17:1)+K	SM	(d18:2_17:1)	M+K	C40 H77 O6 N2 P1 K1	751.518	751.515	0.00326553	4.34524	3661000
TG(12:0e_18:2_19:0)+NH4	TG	(12:0e_18:2_19:0)	M+NH4	C52 H102 O5 N1	820.778	820.775	0.00242953	2.96003	1463000
TG(12:1e_20:4_21:0)+NH4	TG	(12:1e_20:4_21:0)	M+NH4	C56 H104 O5 N1	870.79	870.791	-0.00047747	-0.548318	189600
TG(14:0e_18:2_20:4)+Li	TG	(14:0e_18:2_20:4)	M+Li	C55 H96 O5 Li1	843.743	843.741	0.00187269	2.2195	194900
TG(15:0_18:2_20:4)+NH4	TG	(15:0_18:2_20:4)	M+NH4	C56 H100 O6 N1	882.753	882.755	-0.00175147	-1.9841	126000
TG(15:0_18:3_22:6)+NH4	TG	(15:0_18:3_22:6)	M+NH4	C58 H98 O6 N1	904.74	904.739	0.00148153	1.63752	169100
TG(15:0_22:6_22:6)+NH4	TG	(15:0_22:6_22:6)	M+NH4	C62 H100 O6 N1	954.755	954.755	0.000922424	0.966136	1261000
TG(16:0_18:1_18:2)+Na	TG	(16:0_18:1_18:2)	M+Na	C55 H100 O6 Na1	879.737	879.741	-0.00415947	-4.72808	168200
TG(16:0e_18:2_18:2)+NH4	TG	(16:0e_18:2_18:2)	M+NH4	C55 H104 O5 N1	858.787	858.791	-0.00381647	-4.44402	226500
TG(16:1_12:0_18:2)+NH4	TG	(16:1_12:0_18:2)	M+NH4	C49 H92 O6 N1	790.691	790.692	-0.00055263	-0.698919	1632000
TG(18:1_18:2_22:6)+Na	TG	(18:1_18:2_22:6)	M+Na	C61 H100 O6 Na1	951.738	951.741	-0.00363647	-3.82087	57540
TG(18:1e_18:2_20:4)+H	TG	(18:1e_18:2_20:4)	M+H	C59 H103 O5	891.784	891.78	0.00376253	4.2191	149700
TG(19:0_18:2_18:2)+NH4	TG	(19:0_18:2_18:2)	M+NH4	C58 H108 O6 N1	914.814	914.817	-0.00267497	-2.92406	1026000
TG(20:0_18:2_20:4)+H	TG	(20:0_18:2_20:4)	M+H	C61 H107 O6	935.803	935.806	-0.00364547	-3.89555	414900
TG(22:6_14:3_22:6)+NH4	TG	(22:6_14:3_22:6)	M+NH4	C61 H92 O6 N1	934.696	934.692	0.00454668	4.86434	734600
TG(4:0_10:0_11:2)+Li	TG	(4:0_10:0_11:2)	M+Li	C28 H48 O6 Li1	487.361	487.361	0.00040053	0.821834	11110000
TG(4:0_10:1_11:4)+H	TG	(4:0_10:1_11:4)	M+H	C28 H43 O6	475.306	475.305	0.00107545	2.26263	1791000
TG(4:0_6:0_12:0)+H	TG	(4:0_6:0_12:0)	M+H	C25 H47 O6	443.335	443.337	-0.00199147	-4.49202	1952000
TG(4:0_6:0_14:2)+Li	TG	(4:0_6:0_14:2)	M+Li	C27 H46 O6 Li1	473.345	473.345	0.000303824	0.641865	5447000

## Sheet: CellExtraction_7
LipidIon	Class	FattyAcid	Ion	Formula	ObsMz	CalcMz	Delta(Da)	Delta(PPM)	Area
Cer(d18:1_23:4)+Na	Cer	(d18:1_23:4)	M+Na	C41 H73 O3 N1 Na1	650.545	650.548	-0.00308047	-4.73521	25330
Cer(d18:1_24:1)+H-H2O	Cer	(d18:1_24:1)	M+H-H2O	C42 H80 O2 N1	630.621	630.618	0.00286653	4.54556	2956000
Cer(d18:1_24:3)+H	Cer	(d18:1_24:3)	M+H	C42 H78 O3 N1	644.598	644.598	0.000259259	0.402202	1984000
Cer(d18:1_24:6)+Na	Cer	(d18:1_24:6)	M+Na	C42 H71 O3 N1 Na1	660.534	660.533	0.00132457	2.0053	2194000
Cer(d18:1_25:0)+H	Cer	(d18:1_25:0)	M+H	C43 H86 O3 N1	664.657	664.66	-0.00300947	-4.52785	268200
Cer(d18:1_25:3)+Na	Cer	(d18:1_25:3)	M+Na	C43 H79 O3 N1 Na1	680.592	680.595	-0.00307273	-4.51479	2562000
Cer(d18:1_26:5)+Na	Cer	(d18:1_26:5)	M+Na	C44 H77 O3 N1 Na1	690.576	690.58	-0.00317247	-4.59394	846000
Cer(d20:2_26:6)+Na	Cer	(d20:2_26:6)	M+Na	C46 H77 O3 N1 Na1	714.578	714.58	-0.00129028	-1.80565	1938000
Cer(d21:2_26:2)+H	Cer	(d21:2_26:2)	M+H	C47 H88 O3 N1	714.673	714.676	-0.00334714	-4.68345	1618000
Cer(d21:2_26:5)+H-H2O	Cer	(d21:2_26:5)	M+H-H2O	C47 H80 O2 N1	690.621	690.618	0.00251966	3.64839	2102000
Cer(m17:0_21:5)+NH4	Cer	(m17:0_21:5)	M+NH4	C38 H71 O2 N2	587.548	587.551	-0.00283947	-4.83274	5149000
Cer(m17:0_22:0)+Na	Cer	(m17:0_22:0)	M+Na	C39 H79 O2 N1 Na1	616.599	616.6	-0.001432	-2.32241	16990000
Cer(m17:0_22:0+O)+Na	Cer	(m17:0_22:0+O)	M+Na	C39 H79 O3 N1 Na1	632.593	632.595	-0.00189828	-3.00079	6084000
Cer(m17:0_23:0+O)+H	Cer	(m17:0_23:0+O)	M+H	C40 H82 O3 N1	624.63	624.629	0.0014985	2.39902	11120000
Cer(m17:0_24:4)+Na	Cer	(m17:0_24:4)	M+Na	C41 H75 O2 N1 Na1	636.567	636.569	-0.00239339	-3.75983	1534000
Cer(m17:0_26:0)+H	Cer	(m17:0_26:0)	M+H	C43 H88 O2 N1	650.679	650.681	-0.00186147	-2.86081	110100
Cer(m18:0_26:0)+H-H2O	Cer	(m18:0_26:0)	M+H-H2O	C44 H88 O1 N1	646.685	646.686	-0.0010683	-1.65196	4060000
Cer(m18:0_26:2)+H	Cer	(m18:0_26:2)	M+H	C44 H86 O2 N1	660.663	660.665	-0.00273447	-4.13898	666300
Cer(m18:0_26:6)+H-H2O	Cer	(m18:0_26:6)	M+H-H2O	C44 H76 O1 N1	634.59	634.592	-0.00181954	-2.86727	3851000
Cer(m19:1_26:6)+Na	Cer	(m19:1_26:6)	M+Na	C45 H77 O2 N1 Na1	686.583	686.585	-0.00141302	-2.05804	7374000
Cer(m21:1_26:0+O)+NH4	Cer	(m21:1_26:0+O)	M+NH4	C47 H97 O3 N2	737.749	737.749	-0.00048847	-0.662108	93720
Cer(m22:0_26:5)+H	Cer	(m22:0_26:5)	M+H	C48 H88 O2 N1	710.678	710.681	-0.00254047	-3.57471	1257000
Cer(t18:1_26:4)+Na	Cer	(t18:1_26:4)	M+Na	C44 H79 O4 N1 Na1	708.592	708.59	0.00187665	2.64842	1429000
Cer(t20:0_18:2+2O)+Na	Cer	(t20:0_18:2+2O)	M+Na	C38 H73 O6 N1 Na1	662.531	662.533	-0.00182179	-2.74974	8286000
Cer(t20:0_26:6)+H-H2O	Cer	(t20:0_26:6)	M+H-H2O	C46 H80 O3 N1	694.615	694.613	0.00146046	2.10254	6907000
ChE(30:0)+NH4	ChE	(30:0)	M+NH4	C57 H108 O2 N1	838.838	838.837	0.000992085	1.18269	13840000
DG(10:0e_11:4)+H	DG	(10:0e_11:4)	M+H	C24 H41 O4	393.298	393.3	-0.00185132	-4.70716	515200000
DG(10:0e_11:4)+Li	DG	(10:0e_11:4)	M+Li	C24 H40 O4 Li1	399.308	399.308	0.00018753	0.469636	7851000
DG(10:1e_11:4)+H	DG	(10:1e_11:4)	M+H	C24 H39 O4	391.285	391.284	0.00026653	0.681166	8598000
DG(10:1e_11:4)+Na	DG	(10:1e_11:4)	M+Na	C24 H38 O4 Na1	413.267	413.266	0.000424682	1.02762	25240000
DG(11:0_12:3)+Li	DG	(11:0_12:3)	M+Li	C26 H44 O5 Li1	443.334	443.334	-0.00031947	-0.720607	3428000
DG(12:0e_11:2)+Na	DG	(12:0e_11:2)	M+Na	C26 H48 O4 Na1	447.346	447.344	0.00195953	4.38034	4444000
DG(12:1e_11:4)+H	DG	(12:1e_11:4)	M+H	C26 H43 O4	419.316	419.316	0.00036153	0.862189	16980000
DG(12:1e_11:4)+Na	DG	(12:1e_11:4)	M+Na	C26 H42 O4 Na1	441.298	441.298	0.000406541	0.921239	48720000
DG(14:1e_11:4)+H	DG	(14:1e_11:4)	M+H	C28 H47 O4	447.347	447.347	-0.00035747	-0.799089	26970000
DG(14:1e_11:4)+Na	DG	(14:1e_11:4)	M+Na	C28 H46 O4 Na1	469.329	469.329	0.00053853	1.14744	38820000
DG(16:0_21:0)+NH4	DG	(16:0_21:0)	M+NH4	C40 H82 O5 N1	656.62	656.619	0.00132263	2.01429	2203000
DG(16:1_24:2)+NH4	DG	(16:1_24:2)	M+NH4	C43 H82 O5 N1	692.618	692.619	-0.00101345	-1.46321	6092000
DG(20:0_16:0)+NH4	DG	(20:0_16:0)	M+NH4	C39 H80 O5 N1	642.601	642.603	-0.00162085	-2.52232	3166000
DG(20:0e_16:0)+NH4	DG	(20:0e_16:0)	M+NH4	C39 H82 O4 N1	628.624	628.624	0.000592722	0.942887	7787000
DG(20:2e_23:0)+NH4	DG	(20:2e_23:0)	M+NH4	C46 H92 O4 N1	722.704	722.702	0.00217812	3.01385	1497000
DG(4:0_10:3)+H	DG	(4:0_10:3)	M+H	C17 H27 O5	311.186	311.185	0.00049753	1.59882	667600
DG(4:0_11:3)+Li	DG	(4:0_11:3)	M+Li	C18 H28 O5 Li1	331.21	331.209	0.00069153	2.08789	5501000
DG(4:0_11:4)+Li	DG	(4:0_11:4)	M+Li	C18 H26 O5 Li1	329.193	329.193	1.553e-05	0.0471758	1064000
DG(4:0_15:0)+Na	DG	(4:0_15:0)	M+Na	C22 H42 O5 Na1	409.293	409.292	0.000520362	1.27137	9287000
DG(4:0_16:1)+H	DG	(4:0_16:1)	M+H	C23 H43 O5	399.309	399.311	-0.00189547	-4.74687	7851000
DG(4:0_17:1)+H	DG	(4:0_17:1)	M+H	C24 H45 O5	413.324	413.326	-0.0018861	-4.56324	750400
DG(4:0_18:3)+Li	DG	(4:0_18:3)	M+Li	C25 H42 O5 Li1	429.319	429.319	0.00016953	0.394881	4574000
DG(4:0_20:3)+Li	DG	(4:0_20:3)	M+Li	C27 H46 O5 Li1	457.35	457.35	0.00048353	1.05724	5643000
DG(8:0_11:1)+H	DG	(8:0_11:1)	M+H	C22 H41 O5	385.293	385.295	-0.00171608	-4.45394	3169000
DG(8:0_11:1)+Na	DG	(8:0_11:1)	M+Na	C22 H40 O5 Na1	407.277	407.277	0.000600961	1.47556	4920000
DG(8:0e_11:2)+Na	DG	(8:0e_11:2)	M+Na	C22 H40 O4 Na1	391.283	391.282	0.00079353	2.02802	10200000
DG(8:1e_13:0)+Na	DG	(8:1e_13:0)	M+Na	C24 H46 O4 Na1	421.329	421.329	-2.147e-05	-0.0509578	116300
DG(8:1e_17:1)+NH4	DG	(8:1e_17:1)	M+NH4	C28 H56 O4 N1	470.421	470.42	0.000250023	0.531487	2544000
FA(18:3e)+H	FA	(18:3e)	M+H	O1 H33 C18	265.253	265.253	1.253e-05	0.0472379	3372000
LPC(10:1e)+Li	LPC	(10:1e)	M+Li	C18 H38 O6 N1 P1 Li1	402.259	402.259	1.253e-05	0.031149	2147000
LPI(20:2e)+Na	LPI	(20:2e)	M+Na	C29 H55 O11 N0 P1 Na1	633.339	633.337	0.00128353	2.02661	99820
LPS(10:0e)+Li	LPS	(10:0e)	M+Li	C16 H34 O8 N1 P1 Li1	406.218	406.218	-0.00014647	-0.36057	42240
MG(10:0)+Na	MG	(10:0)	M+Na	C13 H26 O4 Na1	269.172	269.172	-2.247e-05	-0.083478	70740
MG(14:0)+Na	MG	(14:0)	M+Na	C17 H34 O4 Na1	325.236	325.235	0.00066653	2.04937	27480
MG(14:0e)+Na	MG	(14:0e)	M+Na	C17 H36 O3 Na1	311.256	311.256	0.000355236	1.1413	2175000
MG(14:1)+H	MG	(14:1)	M+H	C17 H33 O4	301.238	301.237	0.00040863	1.3565	5863000
MG(18:4)+Li	MG	(18:4)	M+Li	C21 H34 O4 Li1	357.262	357.261	0.000535187	1.49802	1009000
MG(19:1)+H	MG	(19:1)	M+H	C22 H43 O4	371.316	371.316	0.000545209	1.46831	143200000
MG(19:1)+K	MG	(19:1)	M+K	C22 H42 O4 K1	409.272	409.271	0.00041019	1.00224	4227000
MG(19:1)+Na	MG	(19:1)	M+Na	C22 H42 O4 Na1	393.298	393.298	0.000662668	1.6849	515500000
MG(22:4)+Li	MG	(22:4)	M+Li	C25 H42 O4 Li1	413.324	413.324	0.00048753	1.17953	5371000
MG(8:0e)+Li	MG	(8:0e)	M+Li	C11 H24 O3 Li1	211.188	211.188	0.000331356	1.569	1404000
MG(9:0)+Na	MG	(9:0)	M+Na	C12 H24 O4 Na1	255.156	255.157	-0.00028447	-1.11488	259700
OAHFA(12:0_12:0)+H	OAHFA	(12:0_12:0)	M+H	C24 H47 O4	399.347	399.347	-0.00015147	-0.379294	140400
OAHFA(20:0_38:4)+H	OAHFA	(20:0_38:4)	M+H	C58 H107 O4	867.819	867.816	0.00291453	3.35845	301900
PA(18:0e_23:0)+NH4	PA	(18:0e_23:0)	M+NH4	C44 H93 O7 N1 P1	778.666	778.668	-0.00244347	-3.13802	579000
PA(22:0_23:0)+Na	PA	(22:0_23:0)	M+Na	C48 H95 O8 N0 P1 Na1	853.665	853.666	-0.00043847	-0.513632	54920
PA(31:0_20:4)+H	PA	(31:0_20:4)	M+H	C54 H100 O8 N0 P1	907.714	907.715	-0.00058347	-0.64279	56700
PC(12:0e_16:0)+H	PC	(12:0e_16:0)	M+H	C36 H75 O7 N1 P1	664.529	664.528	0.000977316	1.47069	13320000
PC(12:0e_18:2)+K	PC	(12:0e_18:2)	M+K	C38 H74 O7 N1 P1 K1	726.481	726.483	-0.00239798	-3.30081	6408000
PC(12:0e_20:4)+Na	PC	(12:0e_20:4)	M+Na	C40 H74 O7 N1 P1 Na1	734.513	734.51	0.00328867	4.47735	8337000
PC(16:1_12:0)+Li	PC	(16:1_12:0)	M+Li	C36 H70 O8 N1 P1 Li1	682.5	682.499	0.000272904	0.399859	4440000
PC(20:2e_23:0)+Li	PC	(20:2e_23:0)	M+Li	C51 H100 O7 N1 P1 Li1	876.739	876.739	-0.000249365	-0.284423	650800
PC(20:4_23:0)+K	PC	(20:4_23:0)	M+K	C51 H94 O8 N1 P1 K1	918.634	918.635	-0.00095647	-1.04119	515400
PC(20:4e_24:2)+K	PC	(20:4e_24:2)	M+K	C52 H94 O7 N1 P1 K1	914.64	914.64	0.00048553	0.530842	231500
PC(28:0_22:6)+K	PC	(28:0_22:6)	M+K	C58 H104 O8 N1 P1 K1	1012.72	1012.71	0.00212885	2.10212	347600
PC(33:1_18:2)+K	PC	(33:1_18:2)	M+K	C59 H112 O8 N1 P1 K1	1032.77	1032.78	-0.00313742	-3.03786	854200
PC(33:1_18:2)+Na	PC	(33:1_18:2)	M+Na	C59 H112 O8 N1 P1 Na1	1016.8	1016.8	-0.00494247	-4.86082	930400
PE(16:0_21:0)+H	PE	(16:0_21:0)	M+H	C42 H85 O8 N1 P1	762.602	762.601	0.00116661	1.52977	3893000
PE(16:0e_23:0)+Li	PE	(16:0e_23:0)	M+Li	C44 H90 O7 N1 P1 Li1	782.659	782.661	-0.00181747	-2.32217	1099000
PE(16:0e_23:0)+Na	PE	(16:0e_23:0)	M+Na	C44 H90 O7 N1 P1 Na1	798.633	798.635	-0.00158147	-1.98022	143500
PE(18:0_24:1)+Na	PE	(18:0_24:1)	M+Na	C47 H92 O8 N1 P1 Na1	852.642	852.645	-0.00288247	-3.38063	291900
PE(18:0e_18:1)+Na	PE	(18:0e_18:1)	M+Na	C41 H82 O7 N1 P1 Na1	754.571	754.572	-0.00154447	-2.04682	5150000
PE(20:0_24:2)+H	PE	(20:0_24:2)	M+H	C49 H95 O8 N1 P1	856.682	856.679	0.00298507	3.48445	418800
PE(20:0e_20:4)+K	PE	(20:0e_20:4)	M+K	C45 H84 O7 N1 P1 K1	820.561	820.562	-0.00116363	-1.41809	3297000
PE(20:1_24:2)+Na	PE	(20:1_24:2)	M+Na	C49 H92 O8 N1 P1 Na1	876.649	876.645	0.00371453	4.23719	62750
PE(20:3e_23:0)+Na	PE	(20:3e_23:0)	M+Na	C48 H92 O7 N1 P1 Na1	848.65	848.65	-0.000203118	-0.239343	955800
PE(28:0_24:2)+Li	PE	(28:0_24:2)	M+Li	C57 H110 O8 N1 P1 Li1	974.813	974.812	0.00105821	1.08555	8437000
PE(31:1_18:2)+Na	PE	(31:1_18:2)	M+Na	C54 H102 O8 N1 P1 Na1	946.723	946.724	-7.147e-05	-0.0754919	493800
PE(8:1e_23:0)+Na	PE	(8:1e_23:0)	M+Na	C36 H72 O7 N1 P1 Na1	684.497	684.494	0.00264084	3.85807	2897000
PG(22:0_23:0)+Li	PG	(22:0_23:0)	M+Li	C51 H101 O10 N0 P1 Li1	911.73	911.729	0.00092353	1.01294	94730
PG(24:2_23:1)+NH4	PG	(24:2_23:1)	M+NH4	C53 H103 O10 N1 P1	944.727	944.731	-0.00447095	-4.73253	573000
PG(4:0_17:1)+Na	PG	(4:0_17:1)	M+Na	C27 H51 O10 N0 P1 Na1	589.313	589.311	0.00173453	2.94331	84300
phSM(d20:0_24:1)+K	phSM	(d20:0_24:1)	M+K	C49 H99 O7 N2 P1 K1	897.686	897.682	0.00395853	4.4097	84060
phSM(t18:0_24:0)+K	phSM	(t18:0_24:0)	M+K	C47 H97 O8 N2 P1 K1	887.657	887.661	-0.00428247	-4.82446	80140
PI(10:0_11:3)+Na	PI	(10:0_11:3)	M+Na	C30 H51 O13 N0 P1 Na1	673.294	673.296	-0.00241647	-3.58903	27820
PI(15:0_16:1)+NH4	PI	(15:0_16:1)	M+NH4	C40 H79 O13 N1 P1	812.529	812.528	0.00081653	1.00492	4097000
PI(16:0_23:0)+NH4	PI	(16:0_23:0)	M+NH4	C48 H97 O13 N1 P1	926.667	926.669	-0.00252453	-2.72431	552500
PI(18:2e_24:2)+Na	PI	(18:2e_24:2)	M+Na	C51 H93 O12 N0 P1 Na1	951.629	951.63	-0.00027147	-0.285268	59570
PI(20:1_18:2)+NH4	PI	(20:1_18:2)	M+NH4	C47 H89 O13 N1 P1	906.608	906.607	0.0017406	1.9199	650600
PI(20:4_11:4)+NH4	PI	(20:4_11:4)	M+NH4	C40 H65 O13 N1 P1	798.417	798.419	-0.00198947	-2.49177	7137000
PI(20:4_14:3)+NH4	PI	(20:4_14:3)	M+NH4	C43 H73 O13 N1 P1	842.484	842.481	0.00217553	2.58228	45540
PI(20:4e_11:4)+NH4	PI	(20:4e_11:4)	M+NH4	C40 H67 O12 N1 P1	784.44	784.44	0.00019653	0.250535	15140000
PI(20:4e_21:1)+H	PI	(20:4e_21:1)	M+H	C50 H90 O12 N0 P1	913.62	913.616	0.00405353	4.43677	54500
PI(26:1_20:4)+Li	PI	(26:1_20:4)	M+Li	C55 H97 O13 N0 P1 Li1	1003.69	1003.68	0.00353253	3.51956	102300
PI(9:0_20:4)+NH4	PI	(9:0_20:4)	M+NH4	C38 H69 O13 N1 P1	778.448	778.45	-0.00179556	-2.30659	8639000
PS(15:0_22:6)+Li	PS	(15:0_22:6)	M+Li	C43 H72 O10 N1 P1 Li1	800.503	800.505	-0.00172147	-2.15048	7484000
PS(15:0_24:2)+H	PS	(15:0_24:2)	M+H	C45 H85 O10 N1 P1	830.59	830.591	-0.000748324	-0.900954	1336000
PS(17:0_24:2)+K	PS	(17:0_24:2)	M+K	C47 H88 O10 N1 P1 K1	896.58	896.578	0.00206679	2.3052	675800
PS(18:0_16:0)+K	PS	(18:0_16:0)	M+K	C40 H78 O10 N1 P1 K1	802.5	802.499	0.000230797	0.287598	7154000
PS(18:1_20:4)+H	PS	(18:1_20:4)	M+H	C44 H77 O10 N1 P1	810.532	810.528	0.00378072	4.66449	5133000
PS(18:1_22:6)+K	PS	(18:1_22:6)	M+K	C46 H76 O10 N1 P1 K1	872.484	872.484	0.000564582	0.647097	1349000
PS(18:2e_23:0)+Li	PS	(18:2e_23:0)	M+Li	C47 H90 O9 N1 P1 Li1	850.648	850.651	-0.00254647	-2.99356	747200
PS(20:0_24:1)+Na	PS	(20:0_24:1)	M+Na	C50 H96 O10 N1 P1 Na1	924.669	924.666	0.00222889	2.41047	312300
PS(20:0e_22:6)+K	PS	(20:0e_22:6)	M+K	C48 H84 O9 N1 P1 K1	888.548	888.552	-0.00355848	-4.00482	1565000
PS(22:6_14:3)+Li	PS	(22:6_14:3)	M+Li	C42 H64 O10 N1 P1 Li1	780.446	780.442	0.00329521	4.22221	16620000
PS(22:6_22:6)+H	PS	(22:6_22:6)	M+H	C50 H75 O10 N1 P1	880.516	880.512	0.00355776	4.04054	1832000
PS(24:2_23:0)+Li	PS	(24:2_23:0)	M+Li	C53 H100 O10 N1 P1 Li1	948.724	948.724	-0.00038547	-0.406304	158900
PS(26:0_22:6)+K	PS	(26:0_22:6)	M+K	C54 H94 O10 N1 P1 K1	986.624	986.625	-0.00059547	-0.603543	370300
PS(31:1_20:4)+Na	PS	(31:1_20:4)	M+Na	C57 H102 O10 N1 P1 Na1	1014.71	1014.71	-0.00130725	-1.2883	463300
PS(31:1_22:6)+Li	PS	(31:1_22:6)	M+Li	C59 H102 O10 N1 P1 Li1	1022.74	1022.74	0.00361001	3.52973	548100
PS(34:0_20:4)+Li	PS	(34:0_20:4)	M+Li	C60 H110 O10 N1 P1 Li1	1042.8	1042.8	-0.00112591	-1.0797	6550000
PS(8:0e_21:0)+Li	PS	(8:0e_21:0)	M+Li	C35 H70 O9 N1 P1 Li1	686.494	686.494	0.000173477	0.2527	1483000
SiE(13:0)+NH4	SiE	(13:0)	M+NH4	C42 H78 O2 N1	628.6	628.603	-0.00295853	-4.70654	1967000
StE(14:0)+NH4	StE	(14:0)	M+NH4	C43 H78 O2 N1	640.604	640.603	0.00154797	2.41642	2665000
TG(12:1e_17:0_22:6)+NH4	TG	(12:1e_17:0_22:6)	M+NH4	C54 H96 O5 N1	838.729	838.728	0.00031053	0.370239	92960
TG(15:0_18:2_20:4)+NH4	TG	(15:0_18:2_20:4)	M+NH4	C56 H100 O6 N1	882.752	882.755	-0.00261747	-2.96512	94590
TG(15:0_22:6_22:6)+NH4	TG	(15:0_22:6_22:6)	M+NH4	C62 H100 O6 N1	954.756	954.755	0.00121801	1.27573	684800
TG(15:0_6:0_18:1)+NH4	TG	(15:0_6:0_18:1)	M+NH4	C42 H82 O6 N1	696.612	696.614	-0.00181489	-2.6053	4701000
TG(16:0_12:0_16:0)+H	TG	(16:0_12:0_16:0)	M+H	C47 H91 O6	751.684	751.681	0.00325053	4.32433	83320
TG(16:0_12:0_22:6)+H	TG	(16:0_12:0_22:6)	M+H	C53 H91 O6	823.684	823.681	0.00335353	4.07137	58490
TG(16:0_13:0_18:2)+Li	TG	(16:0_13:0_18:2)	M+Li	C50 H92 O6 Li1	795.709	795.705	0.00392953	4.9384	87530
TG(16:1_12:0_18:2)+NH4	TG	(16:1_12:0_18:2)	M+NH4	C49 H92 O6 N1	790.692	790.692	-0.000308083	-0.389637	1168000
TG(16:1_6:0_12:0)+NH4	TG	(16:1_6:0_12:0)	M+NH4	C37 H72 O6 N1	626.538	626.535	0.0027167	4.33605	3023000
TG(16:2e_10:4_14:4)+NH4	TG	(16:2e_10:4_14:4)	M+NH4	C43 H68 O5 N1	678.506	678.509	-0.00306783	-4.52144	2810000
TG(16:2e_11:4_14:4)+NH4	TG	(16:2e_11:4_14:4)	M+NH4	C44 H70 O5 N1	692.528	692.525	0.00287017	4.14449	2640000
TG(18:1_20:4_22:6)+Li	TG	(18:1_20:4_22:6)	M+Li	C63 H100 O6 Li1	959.769	959.767	0.00106253	1.10707	84460
TG(18:1e_18:2_20:4)+H	TG	(18:1e_18:2_20:4)	M+H	C59 H103 O5	891.781	891.78	0.00142653	1.59964	116700
TG(18:3e_19:0_22:6)+Li	TG	(18:3e_19:0_22:6)	M+Li	C62 H104 O5 Li1	935.806	935.804	0.00191453	2.04586	252000
TG(19:0_18:2_18:2)+NH4	TG	(19:0_18:2_18:2)	M+NH4	C58 H108 O6 N1	914.814	914.817	-0.00284947	-3.11481	737300
TG(20:4e_8:0_11:4)+NH4	TG	(20:4e_8:0_11:4)	M+NH4	C42 H70 O5 N1	668.523	668.525	-0.002305	-3.4479	8126000
TG(4:0_10:0_11:2)+Li	TG	(4:0_10:0_11:2)	M+Li	C28 H48 O6 Li1	487.361	487.361	0.00083853	1.72055	4441000
TG(4:0_10:1_11:4)+H	TG	(4:0_10:1_11:4)	M+H	C28 H43 O6	475.306	475.305	0.000809455	1.70302	1927000
TG(4:0_10:2_12:0)+Li	TG	(4:0_10:2_12:0)	M+Li	C29 H50 O6 Li1	501.376	501.376	-0.00013647	-0.272191	2308000
TG(4:0_13:0_22:5)+NH4	TG	(4:0_13:0_22:5)	M+NH4	C42 H74 O6 N1	688.553	688.551	0.00214753	3.1189	3201000
TG(4:0_14:0_20:4)+NH4	TG	(4:0_14:0_20:4)	M+NH4	C41 H74 O6 N1	676.554	676.551	0.00329087	4.86416	10350000
TG(4:0_14:3_22:6)+H	TG	(4:0_14:3_22:6)	M+H	C43 H65 O6	677.481	677.478	0.00330653	4.88062	3295000
TG(4:0_6:0_10:0)+H	TG	(4:0_6:0_10:0)	M+H	C23 H43 O6	415.303	415.305	-0.00194147	-4.67482	750400
TG(4:0_6:0_12:0)+H	TG	(4:0_6:0_12:0)	M+H	C25 H47 O6	443.335	443.337	-0.00200347	-4.51909	2185000
TG(4:0_6:0_13:0)+H	TG	(4:0_6:0_13:0)	M+H	C26 H49 O6	457.351	457.352	-0.00153347	-3.35294	223400
TG(4:0_6:0_14:2)+Li	TG	(4:0_6:0_14:2)	M+Li	C27 H46 O6 Li1	473.345	473.345	0.00032553	0.687721	4132000

## Sheet: CellExtraction_8
LipidIon	Class	FattyAcid	Ion	Formula	ObsMz	CalcMz	Delta(Da)	Delta(PPM)	Area
Cer(d12:0_12:0)+H	Cer	(d12:0_12:0)	M+H	C24 H50 O3 N1	400.379	400.379	9.87734e-05	0.2467	1622000
Cer(d18:1_25:3)+H-H2O	Cer	(d18:1_25:3)	M+H-H2O	C43 H78 O2 N1	640.604	640.603	0.00134953	2.10665	319600
Cer(d23:2_26:4)+H	Cer	(d23:2_26:4)	M+H	C49 H88 O3 N1	738.678	738.676	0.00201353	2.72585	469900
Cer(d24:0_25:1)+Na	Cer	(d24:0_25:1)	M+Na	C49 H97 O3 N1 Na1	770.739	770.736	0.00336853	4.37051	179600
Cer(d24:0_26:0)+H-H2O	Cer	(d24:0_26:0)	M+H-H2O	C50 H100 O2 N1	746.778	746.775	0.00327753	4.38889	146800
Cer(d24:0_26:1)+H-H2O	Cer	(d24:0_26:1)	M+H-H2O	C50 H98 O2 N1	744.76	744.759	0.00082753	1.11114	575700
Cer(d24:0_26:3)+H	Cer	(d24:0_26:3)	M+H	C50 H96 O3 N1	758.736	758.738	-0.00264247	-3.48272	309900
Cer(m17:0_22:0)+Na	Cer	(m17:0_22:0)	M+Na	C39 H79 O2 N1 Na1	616.598	616.6	-0.00196647	-3.18922	1629000
Cer(m17:0_23:0+O)+H	Cer	(m17:0_23:0+O)	M+H	C40 H82 O3 N1	624.63	624.629	0.00125772	2.01354	1167000
Cer(m18:0_26:0)+H-H2O	Cer	(m18:0_26:0)	M+H-H2O	C44 H88 O1 N1	646.685	646.686	-0.000939183	-1.4523	1676000
Cer(m19:1_26:0+O)+Na	Cer	(m19:1_26:0+O)	M+Na	C45 H89 O3 N1 Na1	714.672	714.673	-0.00127946	-1.79027	1460000
Cer(m22:0_26:5)+H	Cer	(m22:0_26:5)	M+H	C48 H88 O2 N1	710.678	710.681	-0.00283505	-3.98922	875800
Cer(t18:0_18:0+2O)+Na	Cer	(t18:0_18:0+2O)	M+Na	C36 H73 O6 N1 Na1	638.535	638.533	0.00213753	3.34755	240400
Cer(t20:0_26:6)+H-H2O	Cer	(t20:0_26:6)	M+H-H2O	C46 H80 O3 N1	694.615	694.613	0.00166377	2.39524	1082000
ChE(30:0)+NH4	ChE	(30:0)	M+NH4	C57 H108 O2 N1	838.838	838.837	0.000512472	0.61093	18370000
DG(10:0_11:3)+H	DG	(10:0_11:3)	M+H	C24 H41 O5	409.293	409.295	-0.0017745	-4.33553	7715000
DG(10:0_11:3)+H	DG	(10:0_11:3)	M+H	C24 H41 O5	409.293	409.295	-0.00187347	-4.57733	1276000
DG(10:0_11:3)+Li	DG	(10:0_11:3)	M+Li	C24 H40 O5 Li1	415.303	415.303	0.000167259	0.402738	767800
DG(10:0e_11:4)+H	DG	(10:0e_11:4)	M+H	C24 H41 O4	393.298	393.3	-0.00190869	-4.85302	399500000
DG(10:0e_11:4)+H	DG	(10:0e_11:4)	M+H	C24 H41 O4	393.298	393.3	-0.00187083	-4.75678	9310000
DG(10:0e_11:4)+H	DG	(10:0e_11:4)	M+H	C24 H41 O4	393.298	393.3	-0.00178041	-4.52686	3192000
DG(10:0e_11:4)+H	DG	(10:0e_11:4)	M+H	C24 H41 O4	393.298	393.3	-0.00179502	-4.56402	495900
DG(10:0e_11:4)+H	DG	(10:0e_11:4)	M+H	C24 H41 O4	393.298	393.3	-0.00189566	-4.8199	400800
DG(10:0e_11:4)+Li	DG	(10:0e_11:4)	M+Li	C24 H40 O4 Li1	399.308	399.308	0.000183828	0.460365	5220000
DG(10:0e_11:4)+Li	DG	(10:0e_11:4)	M+Li	C24 H40 O4 Li1	399.309	399.308	0.000392223	0.982254	4311000
DG(10:0e_11:4)+Li	DG	(10:0e_11:4)	M+Li	C24 H40 O4 Li1	399.308	399.308	1.9601e-05	0.0490873	4217000
DG(10:1e_11:4)+H	DG	(10:1e_11:4)	M+H	C24 H39 O4	391.285	391.284	0.000411336	1.05124	12920000
DG(10:1e_11:4)+H	DG	(10:1e_11:4)	M+H	C24 H39 O4	391.284	391.284	5.953e-05	0.15214	8795000
DG(10:1e_11:4)+H	DG	(10:1e_11:4)	M+H	C24 H39 O4	391.285	391.284	0.00042053	1.07474	8476000
DG(10:1e_11:4)+H	DG	(10:1e_11:4)	M+H	C24 H39 O4	391.285	391.284	0.00042753	1.09263	7779000
DG(10:1e_11:4)+H	DG	(10:1e_11:4)	M+H	C24 H39 O4	391.285	391.284	0.00048353	1.23575	6403000
DG(10:1e_11:4)+H	DG	(10:1e_11:4)	M+H	C24 H39 O4	391.285	391.284	0.00041853	1.06963	5790000
DG(10:1e_11:4)+H	DG	(10:1e_11:4)	M+H	C24 H39 O4	391.285	391.284	0.00036153	0.923955	4968000
DG(10:1e_11:4)+H	DG	(10:1e_11:4)	M+H	C24 H39 O4	391.285	391.284	0.000303397	0.775385	2431000
DG(10:1e_11:4)+H	DG	(10:1e_11:4)	M+H	C24 H39 O4	391.285	391.284	0.000299596	0.765671	847300
DG(10:1e_11:4)+H	DG	(10:1e_11:4)	M+H	C24 H39 O4	391.285	391.284	0.00034353	0.877953	11710
DG(10:1e_11:4)+Na	DG	(10:1e_11:4)	M+Na	C24 H38 O4 Na1	413.267	413.266	0.000327638	0.7928	28380000
DG(10:1e_11:4)+Na	DG	(10:1e_11:4)	M+Na	C24 H38 O4 Na1	413.267	413.266	0.000341076	0.825316	15080000
DG(10:1e_11:4)+Na	DG	(10:1e_11:4)	M+Na	C24 H38 O4 Na1	413.267	413.266	0.000411017	0.994555	12150000
DG(10:1e_11:4)+Na	DG	(10:1e_11:4)	M+Na	C24 H38 O4 Na1	413.266	413.266	0.000258673	0.625921	9363000
DG(10:1e_11:4)+Na	DG	(10:1e_11:4)	M+Na	C24 H38 O4 Na1	413.267	413.266	0.000312052	0.755085	8946000
DG(10:1e_11:4)+Na	DG	(10:1e_11:4)	M+Na	C24 H38 O4 Na1	413.267	413.266	0.000322268	0.779805	7862000
DG(10:1e_11:4)+Na	DG	(10:1e_11:4)	M+Na	C24 H38 O4 Na1	413.267	413.266	0.000274167	0.663413	5841000
DG(10:1e_11:4)+Na	DG	(10:1e_11:4)	M+Na	C24 H38 O4 Na1	413.267	413.266	0.000286877	0.694169	4942000
DG(10:1e_11:4)+Na	DG	(10:1e_11:4)	M+Na	C24 H38 O4 Na1	413.267	413.266	0.000323658	0.783168	4193000
DG(10:1e_11:4)+Na	DG	(10:1e_11:4)	M+Na	C24 H38 O4 Na1	413.267	413.266	0.000367148	0.888404	3817000
DG(10:1e_11:4)+Na	DG	(10:1e_11:4)	M+Na	C24 H38 O4 Na1	413.267	413.266	0.000422606	1.0226	3761000
DG(10:1e_11:4)+Na	DG	(10:1e_11:4)	M+Na	C24 H38 O4 Na1	413.266	413.266	0.000218919	0.529728	3664000
DG(10:1e_11:4)+Na	DG	(10:1e_11:4)	M+Na	C24 H38 O4 Na1	413.267	413.266	0.000341387	0.826069	3397000
DG(10:1e_11:4)+Na	DG	(10:1e_11:4)	M+Na	C24 H38 O4 Na1	413.267	413.266	0.000329222	0.796632	3362000
DG(10:1e_11:4)+Na	DG	(10:1e_11:4)	M+Na	C24 H38 O4 Na1	413.267	413.266	0.000336477	0.814187	3025000
DG(10:1e_11:4)+Na	DG	(10:1e_11:4)	M+Na	C24 H38 O4 Na1	413.267	413.266	0.000279584	0.67652	2783000
DG(10:1e_11:4)+Na	DG	(10:1e_11:4)	M+Na	C24 H38 O4 Na1	413.267	413.266	0.000370894	0.897468	2620000
DG(10:1e_11:4)+Na	DG	(10:1e_11:4)	M+Na	C24 H38 O4 Na1	413.267	413.266	0.000346696	0.838915	2619000
DG(10:1e_11:4)+Na	DG	(10:1e_11:4)	M+Na	C24 H38 O4 Na1	413.267	413.266	0.000370262	0.895939	1978000
DG(10:1e_11:4)+Na	DG	(10:1e_11:4)	M+Na	C24 H38 O4 Na1	413.267	413.266	0.000427695	1.03491	1928000
DG(10:1e_11:4)+Na	DG	(10:1e_11:4)	M+Na	C24 H38 O4 Na1	413.267	413.266	0.000286456	0.69315	1606000
DG(10:1e_11:4)+Na	DG	(10:1e_11:4)	M+Na	C24 H38 O4 Na1	413.267	413.266	0.000292489	0.707749	1413000
DG(10:1e_11:4)+Na	DG	(10:1e_11:4)	M+Na	C24 H38 O4 Na1	413.267	413.266	0.000350722	0.848658	1047000
DG(10:1e_11:4)+Na	DG	(10:1e_11:4)	M+Na	C24 H38 O4 Na1	413.267	413.266	0.00035225	0.852354	1041000
DG(10:1e_11:4)+Na	DG	(10:1e_11:4)	M+Na	C24 H38 O4 Na1	413.267	413.266	0.00032453	0.785279	289300
DG(10:1e_11:4)+Na	DG	(10:1e_11:4)	M+Na	C24 H38 O4 Na1	413.267	413.266	0.00083153	2.01209	175000
DG(10:1e_11:4)+NH4	DG	(10:1e_11:4)	M+NH4	C24 H42 O4 N1	408.309	408.311	-0.00203419	-4.98199	2155000
DG(11:0_12:3)+Li	DG	(11:0_12:3)	M+Li	C26 H44 O5 Li1	443.334	443.334	-0.000234102	-0.528048	9382000
DG(11:0_12:3)+Li	DG	(11:0_12:3)	M+Li	C26 H44 O5 Li1	443.335	443.334	0.00046553	1.05006	4453000
DG(12:0e_11:2)+Na	DG	(12:0e_11:2)	M+Na	C26 H48 O4 Na1	447.346	447.344	0.00190353	4.25515	1347000
DG(12:0e_11:2)+Na	DG	(12:0e_11:2)	M+Na	C26 H48 O4 Na1	447.345	447.344	8.453e-05	0.188959	382200
DG(12:1e_11:4)+H	DG	(12:1e_11:4)	M+H	C26 H43 O4	419.316	419.316	0.00037653	0.897961	15820000
DG(12:1e_11:4)+Na	DG	(12:1e_11:4)	M+Na	C26 H42 O4 Na1	441.298	441.298	0.00027167	0.615614	25320000
DG(12:1e_11:4)+Na	DG	(12:1e_11:4)	M+Na	C26 H42 O4 Na1	441.298	441.298	0.00030053	0.681013	21730000
DG(12:1e_11:4)+Na	DG	(12:1e_11:4)	M+Na	C26 H42 O4 Na1	441.298	441.298	0.000308246	0.698498	20160000
DG(12:1e_11:4)+Na	DG	(12:1e_11:4)	M+Na	C26 H42 O4 Na1	441.298	441.298	0.00026453	0.599436	12180000
DG(12:1e_11:4)+Na	DG	(12:1e_11:4)	M+Na	C26 H42 O4 Na1	441.298	441.298	6.453e-05	0.146228	11350000
DG(12:1e_11:4)+Na	DG	(12:1e_11:4)	M+Na	C26 H42 O4 Na1	441.298	441.298	0.00027428	0.62153	10800000
DG(12:1e_11:4)+Na	DG	(12:1e_11:4)	M+Na	C26 H42 O4 Na1	441.298	441.298	0.00015353	0.347905	8882000
DG(12:1e_11:4)+Na	DG	(12:1e_11:4)	M+Na	C26 H42 O4 Na1	441.298	441.298	0.000258277	0.585267	6604000
DG(12:1e_11:4)+Na	DG	(12:1e_11:4)	M+Na	C26 H42 O4 Na1	441.298	441.298	0.00014153	0.320713	4387000
DG(12:1e_11:4)+Na	DG	(12:1e_11:4)	M+Na	C26 H42 O4 Na1	441.298	441.298	0.00057253	1.29738	3166000
DG(12:1e_11:4)+Na	DG	(12:1e_11:4)	M+Na	C26 H42 O4 Na1	441.298	441.298	0.000263479	0.597053	2989000
DG(12:1e_11:4)+Na	DG	(12:1e_11:4)	M+Na	C26 H42 O4 Na1	441.298	441.298	0.00010253	0.232337	2867000
DG(12:1e_11:4)+Na	DG	(12:1e_11:4)	M+Na	C26 H42 O4 Na1	441.298	441.298	0.00020353	0.461207	2452000
DG(12:1e_11:4)+Na	DG	(12:1e_11:4)	M+Na	C26 H42 O4 Na1	441.298	441.298	0.00028953	0.656087	2450000
DG(12:1e_11:4)+Na	DG	(12:1e_11:4)	M+Na	C26 H42 O4 Na1	441.298	441.298	0.00019753	0.447611	2444000
DG(12:1e_11:4)+Na	DG	(12:1e_11:4)	M+Na	C26 H42 O4 Na1	441.298	441.298	0.00021553	0.4884	999600
DG(12:1e_11:4)+Na	DG	(12:1e_11:4)	M+Na	C26 H42 O4 Na1	441.297	441.298	-3.39752e-05	-0.0769892	696700
DG(14:1e_11:4)+H	DG	(14:1e_11:4)	M+H	C28 H47 O4	447.346	447.347	-0.000602284	-1.34635	20490000
DG(14:1e_11:4)+H	DG	(14:1e_11:4)	M+H	C28 H47 O4	447.346	447.347	-0.00069647	-1.55689	19160000
DG(14:1e_11:4)+H	DG	(14:1e_11:4)	M+H	C28 H47 O4	447.346	447.347	-0.000894889	-2.00044	5255000
DG(14:1e_11:4)+Na	DG	(14:1e_11:4)	M+Na	C28 H46 O4 Na1	469.329	469.329	0.00044253	0.942898	83090000
DG(14:1e_11:4)+Na	DG	(14:1e_11:4)	M+Na	C28 H46 O4 Na1	469.329	469.329	0.000460974	0.982197	42690000
DG(14:1e_11:4)+Na	DG	(14:1e_11:4)	M+Na	C28 H46 O4 Na1	469.329	469.329	0.000268511	0.572115	16430000
DG(14:1e_11:4)+Na	DG	(14:1e_11:4)	M+Na	C28 H46 O4 Na1	469.329	469.329	0.000295369	0.629342	7764000
DG(14:1e_11:4)+Na	DG	(14:1e_11:4)	M+Na	C28 H46 O4 Na1	469.329	469.329	0.00017953	0.382524	6023000
DG(14:1e_11:4)+Na	DG	(14:1e_11:4)	M+Na	C28 H46 O4 Na1	469.329	469.329	0.000188422	0.401471	5037000
DG(14:1e_11:4)+Na	DG	(14:1e_11:4)	M+Na	C28 H46 O4 Na1	469.329	469.329	0.000397012	0.845912	3951000
DG(14:1e_11:4)+Na	DG	(14:1e_11:4)	M+Na	C28 H46 O4 Na1	469.329	469.329	8.753e-05	0.1865	3580000
DG(14:1e_11:4)+Na	DG	(14:1e_11:4)	M+Na	C28 H46 O4 Na1	469.329	469.329	0.00048853	1.04091	3515000
DG(14:1e_11:4)+Na	DG	(14:1e_11:4)	M+Na	C28 H46 O4 Na1	469.329	469.329	8.253e-05	0.175847	2130000
DG(14:1e_11:4)+Na	DG	(14:1e_11:4)	M+Na	C28 H46 O4 Na1	469.329	469.329	-6.08475e-05	-0.129648	2097000
DG(14:1e_11:4)+Na	DG	(14:1e_11:4)	M+Na	C28 H46 O4 Na1	469.329	469.329	0.00017553	0.374002	1670000
DG(14:1e_11:4)+Na	DG	(14:1e_11:4)	M+Na	C28 H46 O4 Na1	469.329	469.329	0.00023053	0.49119	1028000
DG(14:1e_11:4)+Na	DG	(14:1e_11:4)	M+Na	C28 H46 O4 Na1	469.329	469.329	0.00037553	0.800141	713000
DG(16:1_24:2)+NH4	DG	(16:1_24:2)	M+NH4	C43 H82 O5 N1	692.618	692.619	-0.00121523	-1.75455	925700
DG(20:2e_23:0)+NH4	DG	(20:2e_23:0)	M+NH4	C46 H92 O4 N1	722.704	722.702	0.00215497	2.98182	2230000
DG(20:4_12:4)+H	DG	(20:4_12:4)	M+H	C35 H53 O5	553.389	553.389	0.0004226	0.763656	6128000
DG(4:0_10:3)+H	DG	(4:0_10:3)	M+H	C17 H27 O5	311.186	311.185	0.000272498	0.875675	936300
DG(4:0_17:1)+H	DG	(4:0_17:1)	M+H	C24 H45 O5	413.325	413.326	-0.00159247	-3.85283	3458000
DG(4:0_17:1)+H	DG	(4:0_17:1)	M+H	C24 H45 O5	413.324	413.326	-0.00206247	-4.98995	2814000
DG(4:0_17:1)+H	DG	(4:0_17:1)	M+H	C24 H45 O5	413.325	413.326	-0.00164847	-3.98831	1449000
DG(4:0_17:1)+H	DG	(4:0_17:1)	M+H	C24 H45 O5	413.324	413.326	-0.00204647	-4.95124	1125000
DG(4:0_17:1)+H	DG	(4:0_17:1)	M+H	C24 H45 O5	413.324	413.326	-0.00198191	-4.79505	828000
DG(4:0_17:1)+H	DG	(4:0_17:1)	M+H	C24 H45 O5	413.324	413.326	-0.00196647	-4.75769	731500
DG(4:0_17:1)+H	DG	(4:0_17:1)	M+H	C24 H45 O5	413.324	413.326	-0.00172847	-4.18187	491000
DG(4:0_17:1)+H	DG	(4:0_17:1)	M+H	C24 H45 O5	413.324	413.326	-0.00186936	-4.52273	215000
DG(4:0_17:1)+H	DG	(4:0_17:1)	M+H	C24 H45 O5	413.324	413.326	-0.00190609	-4.61161	141700
DG(4:0_18:3)+Li	DG	(4:0_18:3)	M+Li	C25 H42 O5 Li1	429.319	429.319	0.000115185	0.268296	4272000
DG(4:0_18:3)+Li	DG	(4:0_18:3)	M+Li	C25 H42 O5 Li1	429.319	429.319	-0.00012747	-0.296912	1809000
DG(4:0_20:3)+Li	DG	(4:0_20:3)	M+Li	C27 H46 O5 Li1	457.35	457.35	0.000327563	0.716217	8615000
DG(4:0_6:0)+K	DG	(4:0_6:0)	M+K	C13 H24 O5 K1	299.126	299.126	0.00091253	3.05064	2920000
DG(4:0_6:0)+K	DG	(4:0_6:0)	M+K	C13 H24 O5 K1	299.125	299.126	-0.00021547	-0.720332	672300
DG(8:0_11:1)+H	DG	(8:0_11:1)	M+H	C22 H41 O5	385.293	385.295	-0.00177473	-4.60618	44250
DG(8:0_11:1)+Na	DG	(8:0_11:1)	M+Na	C22 H40 O5 Na1	407.277	407.277	0.00040616	0.997256	5149000
DG(8:0_11:1)+Na	DG	(8:0_11:1)	M+Na	C22 H40 O5 Na1	407.277	407.277	0.000476377	1.16966	3920000
DG(8:0e_11:2)+Na	DG	(8:0e_11:2)	M+Na	C22 H40 O4 Na1	391.284	391.282	0.00176985	4.52318	10380000
DG(8:1e_17:1)+NH4	DG	(8:1e_17:1)	M+NH4	C28 H56 O4 N1	470.421	470.42	0.000162719	0.3459	1636000
FA(18:3e)+H	FA	(18:3e)	M+H	O1 H33 C18	265.252	265.253	-0.00028147	-1.06114	3688000
FA(18:3e)+H	FA	(18:3e)	M+H	O1 H33 C18	265.252	265.253	-0.00039047	-1.47207	2052000
LPC(10:1e)+Li	LPC	(10:1e)	M+Li	C18 H38 O6 N1 P1 Li1	402.26	402.259	0.00059453	1.47797	1460000
LPC(10:1e)+Li	LPC	(10:1e)	M+Li	C18 H38 O6 N1 P1 Li1	402.259	402.259	-0.00042347	-1.05273	399700
LPE(14:1e)+Li	LPE	(14:1e)	M+Li	C19 H40 O6 N1 P1 Li1	416.275	416.275	0.00029053	0.697927	1207000
LPS(6:0)+K	LPS	(6:0)	M+K	C12 H24 O9 N1 P1 K1	396.08	396.082	-0.00197647	-4.99007	884300
MG(11:0)+K	MG	(11:0)	M+K	C14 H28 O4 K1	299.162	299.162	0.00019453	0.650248	466200
MG(14:0e)+Na	MG	(14:0e)	M+Na	C17 H36 O3 Na1	311.256	311.256	0.000265435	0.852786	1738000
MG(14:1)+H	MG	(14:1)	M+H	C17 H33 O4	301.238	301.237	0.000316936	1.05211	3574000
MG(18:4)+Li	MG	(18:4)	M+Li	C21 H34 O4 Li1	357.261	357.261	0.000262871	0.735792	930600
MG(19:1)+H	MG	(19:1)	M+H	C22 H43 O4	371.316	371.316	0.000521175	1.40359	87190000
MG(19:1)+K	MG	(19:1)	M+K	C22 H42 O4 K1	409.272	409.271	0.000362748	0.886325	3729000
MG(19:1)+Na	MG	(19:1)	M+Na	C22 H42 O4 Na1	393.298	393.298	0.000463674	1.17894	399500000
MG(19:1)+Na	MG	(19:1)	M+Na	C22 H42 O4 Na1	393.298	393.298	0.000381431	0.969826	14600000
MG(19:1)+Na	MG	(19:1)	M+Na	C22 H42 O4 Na1	393.298	393.298	0.000439356	1.11711	13000000
MG(19:1)+Na	MG	(19:1)	M+Na	C22 H42 O4 Na1	393.298	393.298	0.000426682	1.08488	9310000
MG(19:1)+Na	MG	(19:1)	M+Na	C22 H42 O4 Na1	393.298	393.298	0.000557763	1.41817	9304000
MG(19:1)+Na	MG	(19:1)	M+Na	C22 H42 O4 Na1	393.298	393.298	0.00043653	1.10992	9195000
MG(19:1)+Na	MG	(19:1)	M+Na	C22 H42 O4 Na1	393.298	393.298	0.000314018	0.798421	9149000
MG(19:1)+Na	MG	(19:1)	M+Na	C22 H42 O4 Na1	393.298	393.298	0.000425332	1.08145	8207000
MG(19:1)+Na	MG	(19:1)	M+Na	C22 H42 O4 Na1	393.298	393.298	0.00024353	0.619199	7055000
MG(19:1)+Na	MG	(19:1)	M+Na	C22 H42 O4 Na1	393.298	393.298	0.000581596	1.47876	4578000
MG(19:1)+Na	MG	(19:1)	M+Na	C22 H42 O4 Na1	393.298	393.298	0.000478231	1.21595	4376000
MG(19:1)+Na	MG	(19:1)	M+Na	C22 H42 O4 Na1	393.298	393.298	0.00031453	0.799724	4122000
MG(19:1)+Na	MG	(19:1)	M+Na	C22 H42 O4 Na1	393.298	393.298	0.00036153	0.919226	3192000
MG(19:1)+Na	MG	(19:1)	M+Na	C22 H42 O4 Na1	393.298	393.298	0.000437574	1.11258	2796000
MG(19:1)+Na	MG	(19:1)	M+Na	C22 H42 O4 Na1	393.298	393.298	0.000487284	1.23897	2128000
MG(19:1)+Na	MG	(19:1)	M+Na	C22 H42 O4 Na1	393.298	393.298	0.000441406	1.12232	1576000
MG(19:1)+Na	MG	(19:1)	M+Na	C22 H42 O4 Na1	393.298	393.298	0.000353821	0.899625	1268000
MG(19:1)+Na	MG	(19:1)	M+Na	C22 H42 O4 Na1	393.298	393.298	0.000453305	1.15257	1027000
MG(22:1)+NH4	MG	(22:1)	M+NH4	C25 H52 O4 N1	430.389	430.389	0.00028853	0.670392	2695000
MG(22:4)+Li	MG	(22:4)	M+Li	C25 H42 O4 Li1	413.324	413.324	0.000335064	0.810655	3987000
MG(22:4)+Li	MG	(22:4)	M+Li	C25 H42 O4 Li1	413.324	413.324	0.000349872	0.846483	3987000
MG(22:4)+Li	MG	(22:4)	M+Li	C25 H42 O4 Li1	413.324	413.324	0.00010269	0.248449	3458000
MG(22:4)+Li	MG	(22:4)	M+Li	C25 H42 O4 Li1	413.324	413.324	0.000233358	0.564587	3326000
MG(22:4)+Li	MG	(22:4)	M+Li	C25 H42 O4 Li1	413.324	413.324	0.000189764	0.459117	2814000
MG(22:4)+Li	MG	(22:4)	M+Li	C25 H42 O4 Li1	413.324	413.324	0.000272868	0.660178	2481000
MG(22:4)+Li	MG	(22:4)	M+Li	C25 H42 O4 Li1	413.324	413.324	0.000159003	0.384693	2166000
MG(22:4)+Li	MG	(22:4)	M+Li	C25 H42 O4 Li1	413.324	413.324	0.00024753	0.598876	828000
MG(22:4)+Li	MG	(22:4)	M+Li	C25 H42 O4 Li1	413.324	413.324	7.853e-05	0.189996	666100
MG(9:0)+Na	MG	(9:0)	M+Na	C12 H24 O4 Na1	255.156	255.157	-0.00026247	-1.02866	968700
MG(9:0)+Na	MG	(9:0)	M+Na	C12 H24 O4 Na1	255.157	255.157	-0.00014147	-0.554443	534400
OAHFA(15:0_36:1)+H	OAHFA	(15:0_36:1)	M+H	C51 H99 O4	775.756	775.754	0.00258934	3.33782	223500
OAHFA(16:0_38:4)+H	OAHFA	(16:0_38:4)	M+H	C54 H99 O4	811.751	811.754	-0.00258247	-3.18135	210000
OAHFA(20:0_38:4)+H	OAHFA	(20:0_38:4)	M+H	C58 H107 O4	867.818	867.816	0.00137221	1.58122	465000
PA(24:0_23:0)+NH4	PA	(24:0_23:0)	M+NH4	C50 H103 O8 N1 P1	876.739	876.742	-0.00260195	-2.96776	1368000
PA(28:1_23:0)+NH4	PA	(28:1_23:0)	M+NH4	C54 H109 O8 N1 P1	930.791	930.789	0.00252962	2.71771	268600
PA(37:0_22:6)+Na	PA	(37:0_22:6)	M+Na	C62 H111 O8 N0 P1 Na1	1037.79	1037.79	-0.00418947	-4.03693	321200
PC(16:1e_24:2)+Na	PC	(16:1e_24:2)	M+Na	C48 H92 O7 N1 P1 Na1	848.65	848.65	-0.000541318	-0.637857	1233000
PC(20:4e_24:2)+K	PC	(20:4e_24:2)	M+K	C52 H94 O7 N1 P1 K1	914.64	914.64	0.000164357	0.179695	392300
PC(33:1_18:2)+K	PC	(33:1_18:2)	M+K	C59 H112 O8 N1 P1 K1	1032.77	1032.78	-0.00364758	-3.53183	1317000
PE(16:0e_23:0)+Li	PE	(16:0e_23:0)	M+Li	C44 H90 O7 N1 P1 Li1	782.659	782.661	-0.001463	-1.86927	1281000
PE(19:1_24:2)+Li	PE	(19:1_24:2)	M+Li	C48 H90 O8 N1 P1 Li1	846.653	846.656	-0.00333947	-3.94432	560400
PE(20:0_24:2)+H	PE	(20:0_24:2)	M+H	C49 H95 O8 N1 P1	856.681	856.679	0.00192183	2.24334	742000
PE(20:1e_18:2)+Li	PE	(20:1e_18:2)	M+Li	C43 H82 O7 N1 P1 Li1	762.602	762.598	0.00331827	4.35124	1009000
PE(22:0_23:0)+Li	PE	(22:0_23:0)	M+Li	C50 H100 O8 N1 P1 Li1	880.738	880.734	0.00363353	4.12555	392900
PE(28:0_24:2)+K	PE	(28:0_24:2)	M+K	C57 H110 O8 N1 P1 K1	1006.77	1006.76	0.00500153	4.96792	80950
PE(28:0_24:2)+Li	PE	(28:0_24:2)	M+Li	C57 H110 O8 N1 P1 Li1	974.813	974.812	0.000632541	0.648885	10810000
PE(31:0_22:6)+K	PE	(31:0_22:6)	M+K	C58 H104 O8 N1 P1 K1	1012.71	1012.71	0.00165906	1.63823	793600
PE(31:1_18:2)+K	PE	(31:1_18:2)	M+K	C54 H102 O8 N1 P1 K1	962.697	962.697	-0.00017847	-0.185385	171200
PE(31:1_18:2)+Na	PE	(31:1_18:2)	M+Na	C54 H102 O8 N1 P1 Na1	946.724	946.724	0.000420507	0.44417	1107000
PE(36:1_18:2)+Na	PE	(36:1_18:2)	M+Na	C59 H112 O8 N1 P1 Na1	1016.8	1016.8	-0.00500347	-4.92081	1026000
PG(20:0_24:1)+NH4	PG	(20:0_24:1)	M+NH4	C50 H101 O10 N1 P1	906.717	906.716	0.00154453	1.70343	83250
PG(24:1_23:0)+K	PG	(24:1_23:0)	M+K	C53 H103 O10 N0 P1 K1	969.693	969.692	0.00118753	1.22464	76860
PG(26:1_23:0)+H	PG	(26:1_23:0)	M+H	C55 H108 O10 N0 P1	959.768	959.767	0.00086553	0.901811	138400
PG(28:1_24:2)+Li	PG	(28:1_24:2)	M+Li	C58 H109 O10 N0 P1 Li1	1003.79	1003.79	0.000577938	0.575754	274500
phSM(d18:0_24:0)+H	phSM	(d18:0_24:0)	M+H	C47 H98 O7 N2 P1	833.714	833.711	0.00325353	3.90245	171600
PI(16:0_23:0)+NH4	PI	(16:0_23:0)	M+NH4	C48 H97 O13 N1 P1	926.666	926.669	-0.00290712	-3.13718	1087000
PI(20:0e_24:2)+K	PI	(20:0e_24:2)	M+K	C53 H101 O12 N0 P1 K1	999.666	999.666	-0.00010447	-0.104505	102300
PI(20:1_18:2)+NH4	PI	(20:1_18:2)	M+NH4	C47 H89 O13 N1 P1	906.607	906.607	0.00022453	0.24766	815600
PI(20:2e_24:2)+NH4	PI	(20:2e_24:2)	M+NH4	C53 H101 O12 N1 P1	974.704	974.706	-0.00169147	-1.73537	86950
PI(20:4e_11:4)+NH4	PI	(20:4e_11:4)	M+NH4	C40 H67 O12 N1 P1	784.437	784.44	-0.00236547	-3.0155	4657000
PI(22:4_22:6)+NH4	PI	(22:4_22:6)	M+NH4	C53 H87 O13 N1 P1	976.593	976.591	0.00253753	2.59835	656200
PI(28:1_18:2)+NH4	PI	(28:1_18:2)	M+NH4	C55 H105 O13 N1 P1	1018.73	1018.73	-0.00304947	-2.99341	94060
PI(9:0_20:4)+NH4	PI	(9:0_20:4)	M+NH4	C38 H69 O13 N1 P1	778.448	778.45	-0.00192136	-2.46819	2594000
PS(15:0_24:2)+H	PS	(15:0_24:2)	M+H	C45 H85 O10 N1 P1	830.59	830.591	-0.00104547	-1.25871	847100
PS(18:2e_23:0)+Li	PS	(18:2e_23:0)	M+Li	C47 H90 O9 N1 P1 Li1	850.648	850.651	-0.00262047	-3.08055	1013000
PS(20:0_24:1)+Na	PS	(20:0_24:1)	M+Na	C50 H96 O10 N1 P1 Na1	924.669	924.666	0.00225484	2.43853	607100
PS(20:0e_24:1)+Li	PS	(20:0e_24:1)	M+Li	C50 H98 O9 N1 P1 Li1	894.71	894.713	-0.00287747	-3.21609	190200
PS(20:1_24:2)+Na	PS	(20:1_24:2)	M+Na	C50 H92 O10 N1 P1 Na1	920.631	920.635	-0.00383347	-4.16396	223600
PS(22:6_14:3)+Li	PS	(22:6_14:3)	M+Li	C42 H64 O10 N1 P1 Li1	780.445	780.442	0.00317407	4.06699	5467000
PS(24:1_23:0)+H	PS	(24:1_23:0)	M+H	C53 H103 O10 N1 P1	944.727	944.731	-0.00446556	-4.72683	931700
PS(31:1_20:4)+Na	PS	(31:1_20:4)	M+Na	C57 H102 O10 N1 P1 Na1	1014.71	1014.71	-0.00153655	-1.51427	835300
PS(31:1_22:6)+Li	PS	(31:1_22:6)	M+Li	C59 H102 O10 N1 P1 Li1	1022.74	1022.74	0.00346929	3.39214	993400
PS(33:0_18:2)+H	PS	(33:0_18:2)	M+H	C57 H109 O10 N1 P1	998.776	998.778	-0.00254147	-2.54458	240200
PS(34:0_20:4)+Li	PS	(34:0_20:4)	M+Li	C60 H110 O10 N1 P1 Li1	1042.8	1042.8	-0.00149888	-1.43736	8554000
SM(d18:2_17:1)+K	SM	(d18:2_17:1)	M+K	C40 H77 O6 N2 P1 K1	751.518	751.515	0.00289253	3.84891	3264000
TG(12:0e_18:1_18:2)+NH4	TG	(12:0e_18:1_18:2)	M+NH4	C51 H98 O5 N1	804.74	804.744	-0.00346847	-4.31004	109400
TG(12:1e_17:0_22:6)+NH4	TG	(12:1e_17:0_22:6)	M+NH4	C54 H96 O5 N1	838.729	838.728	0.00105853	1.26206	142500
TG(12:1e_19:0_20:4)+K	TG	(12:1e_19:0_20:4)	M+K	C54 H96 O5 K1	863.692	863.689	0.00334953	3.87815	170200
TG(14:0e_16:0_16:0)+Li	TG	(14:0e_16:0_16:0)	M+Li	C49 H96 O5 Li1	771.741	771.741	-6.947e-05	-0.0900172	176000
TG(15:0_18:1_18:2)+H	TG	(15:0_18:1_18:2)	M+H	C54 H99 O6	843.745	843.744	0.00142053	1.6836	146200
TG(15:0_22:6_22:6)+NH4	TG	(15:0_22:6_22:6)	M+NH4	C62 H100 O6 N1	954.756	954.755	0.00148313	1.55341	1300000
TG(16:0_13:0_18:2)+Li	TG	(16:0_13:0_18:2)	M+Li	C50 H92 O6 Li1	795.705	795.705	-5.947e-05	-0.0747387	108700
TG(16:0_18:2_22:1)+Na	TG	(16:0_18:2_22:1)	M+Na	C59 H108 O6 Na1	935.805	935.804	0.00118453	1.26579	313000
TG(16:0e_18:2_18:2)+NH4	TG	(16:0e_18:2_18:2)	M+NH4	C55 H104 O5 N1	858.787	858.791	-0.00360247	-4.19483	198600
TG(16:1_12:0_18:2)+NH4	TG	(16:1_12:0_18:2)	M+NH4	C49 H92 O6 N1	790.691	790.692	-0.000524661	-0.663547	1910000
TG(16:1e_18:2_20:4)+K	TG	(16:1e_18:2_20:4)	M+K	C57 H98 O5 K1	901.701	901.705	-0.00352347	-3.90758	74350
TG(16:2e_10:4_12:4)+H	TG	(16:2e_10:4_12:4)	M+H	C41 H61 O5	633.454	633.451	0.00296643	4.68293	7726000
TG(19:0_18:2_18:2)+NH4	TG	(19:0_18:2_18:2)	M+NH4	C58 H108 O6 N1	914.814	914.817	-0.00307959	-3.36635	914800
TG(19:1_22:6_22:6)+NH4	TG	(19:1_22:6_22:6)	M+NH4	C66 H106 O6 N1	1008.81	1008.8	0.00483585	4.79363	2143000
TG(20:4e_19:0_22:6)+K	TG	(20:4e_19:0_22:6)	M+K	C64 H106 O5 K1	993.763	993.767	-0.00428347	-4.31035	173000
TG(22:6_13:0_22:6)+Na	TG	(22:6_13:0_22:6)	M+Na	C60 H92 O6 Na1	931.681	931.679	0.00226253	2.42844	101500
TG(4:0_10:0_11:2)+Li	TG	(4:0_10:0_11:2)	M+Li	C28 H48 O6 Li1	487.36	487.361	-0.00032847	-0.673977	8590000
TG(4:0_10:0_11:2)+Li	TG	(4:0_10:0_11:2)	M+Li	C28 H48 O6 Li1	487.361	487.361	0.000358123	0.73482	2167000
TG(4:0_10:0_11:2)+Li	TG	(4:0_10:0_11:2)	M+Li	C28 H48 O6 Li1	487.361	487.361	0.000399698	0.820126	224000
TG(4:0_10:1_11:4)+H	TG	(4:0_10:1_11:4)	M+H	C28 H43 O6	475.306	475.305	0.000962807	2.02565	1437000
TG(4:0_10:2_12:0)+Li	TG	(4:0_10:2_12:0)	M+Li	C29 H50 O6 Li1	501.376	501.376	0.00021253	0.423893	964500
TG(4:0_12:3_22:6)+H	TG	(4:0_12:3_22:6)	M+H	C41 H61 O6	649.449	649.446	0.00319253	4.91574	3880000
TG(4:0_14:0_20:4)+NH4	TG	(4:0_14:0_20:4)	M+NH4	C41 H74 O6 N1	676.554	676.551	0.00304253	4.49709	957800
TG(4:0_6:0_11:0)+H	TG	(4:0_6:0_11:0)	M+H	C24 H45 O6	429.322	429.321	0.00050153	1.16819	4662000
TG(4:0_6:0_11:0)+H	TG	(4:0_6:0_11:0)	M+H	C24 H45 O6	429.319	429.321	-0.00193547	-4.50823	47220
TG(4:0_6:0_12:0)+H	TG	(4:0_6:0_12:0)	M+H	C25 H47 O6	443.335	443.337	-0.00203947	-4.60029	2940000
TG(4:0_6:0_13:0)+H	TG	(4:0_6:0_13:0)	M+H	C26 H49 O6	457.35	457.352	-0.00199693	-4.36629	4851000
TG(4:0_6:0_14:2)+Li	TG	(4:0_6:0_14:2)	M+Li	C27 H46 O6 Li1	473.345	473.345	0.00015153	0.320126	1914000
TG(6:0_11:3_22:6)+H	TG	(6:0_11:3_22:6)	M+H	C42 H63 O6	663.465	663.462	0.00328453	4.95056	2381000

## Sheet: CellExtraction_9
LipidIon	Class	FattyAcid	Ion	Formula	ObsMz	CalcMz	Delta(Da)	Delta(PPM)	Area
Cer(d18:1_26:3)+Na	Cer	(d18:1_26:3)	M+Na	C44 H81 O3 N1 Na1	694.614	694.611	0.00345373	4.97215	752500
Cer(m17:0_23:0+O)+H	Cer	(m17:0_23:0+O)	M+H	C40 H82 O3 N1	624.63	624.629	0.00100424	1.60774	812400
Cer(m18:0_26:0)+H-H2O	Cer	(m18:0_26:0)	M+H-H2O	C44 H88 O1 N1	646.685	646.686	-0.000556059	-0.85986	1220000
Cer(m20:0_26:2)+Na	Cer	(m20:0_26:2)	M+Na	C46 H89 O2 N1 Na1	710.678	710.679	-0.000526955	-0.741481	626500
Cer(t16:0_25:0+O)+Na	Cer	(t16:0_25:0+O)	M+Na	C41 H83 O5 N1 Na1	692.617	692.616	0.000869496	1.25538	634200
Cer(t20:0_18:2+2O)+Na	Cer	(t20:0_18:2+2O)	M+Na	C38 H73 O6 N1 Na1	662.531	662.533	-0.00189753	-2.86406	2316000
Cer(t20:0_26:0+O)+H-H2O	Cer	(t20:0_26:0+O)	M+H-H2O	C46 H92 O4 N1	722.704	722.702	0.00166224	2.30003	1580000
ChE(30:0)+NH4	ChE	(30:0)	M+NH4	C57 H108 O2 N1	838.838	838.837	0.000647004	0.771309	19550000
DG(10:0_11:3)+Li	DG	(10:0_11:3)	M+Li	C24 H40 O5 Li1	415.303	415.303	0.000104111	0.250686	901100
DG(10:0e_11:4)+H	DG	(10:0e_11:4)	M+H	C24 H41 O4	393.298	393.3	-0.00195971	-4.98275	11610000
DG(10:0e_11:4)+Li	DG	(10:0e_11:4)	M+Li	C24 H40 O4 Li1	399.308	399.308	0.000117149	0.293381	7824000
DG(10:1e_11:4)+H	DG	(10:1e_11:4)	M+H	C24 H39 O4	391.284	391.284	0.0001539	0.39332	23540000
DG(10:1e_11:4)+Na	DG	(10:1e_11:4)	M+Na	C24 H38 O4 Na1	413.266	413.266	0.000225772	0.546311	24950000
DG(11:0_12:3)+Li	DG	(11:0_12:3)	M+Li	C26 H44 O5 Li1	443.334	443.334	0.000138171	0.311663	9478000
DG(12:0e_11:2)+Na	DG	(12:0e_11:2)	M+Na	C26 H48 O4 Na1	447.346	447.344	0.00194085	4.33858	7782000
DG(12:1e_11:4)+H	DG	(12:1e_11:4)	M+H	C26 H43 O4	419.316	419.316	0.00017153	0.409071	8160000
DG(12:1e_11:4)+Na	DG	(12:1e_11:4)	M+Na	C26 H42 O4 Na1	441.298	441.298	0.000190573	0.431845	25470000
DG(14:1e_11:4)+H	DG	(14:1e_11:4)	M+H	C28 H47 O4	447.346	447.347	-0.00086147	-1.92573	2164000
DG(14:1e_11:4)+Na	DG	(14:1e_11:4)	M+Na	C28 H46 O4 Na1	469.329	469.329	0.000322744	0.687671	66500000
DG(24:1_23:0)+Li	DG	(24:1_23:0)	M+Li	C50 H96 O5 Li1	783.743	783.741	0.00138453	1.76656	48790
DG(4:0_10:3)+H	DG	(4:0_10:3)	M+H	C17 H27 O5	311.185	311.185	2.353e-05	0.075614	1467000
DG(4:0_11:3)+Li	DG	(4:0_11:3)	M+Li	C18 H28 O5 Li1	331.21	331.209	0.00041353	1.24854	1319000
DG(4:0_17:1)+H	DG	(4:0_17:1)	M+H	C24 H45 O5	413.324	413.326	-0.00200514	-4.85124	3891000
DG(4:0_18:3)+Li	DG	(4:0_18:3)	M+Li	C25 H42 O5 Li1	429.319	429.319	6.17945e-05	0.143936	5673000
DG(4:0_20:3)+Li	DG	(4:0_20:3)	M+Li	C27 H46 O5 Li1	457.35	457.35	8.553e-05	0.187012	8200000
DG(8:0e_11:2)+Na	DG	(8:0e_11:2)	M+Na	C22 H40 O4 Na1	391.283	391.282	0.000680686	1.73963	-1
DG(8:1e_13:0)+Na	DG	(8:1e_13:0)	M+Na	C24 H46 O4 Na1	421.329	421.329	0.000493852	1.17213	143700
FA(18:3e)+H	FA	(18:3e)	M+H	O1 H33 C18	265.252	265.253	-0.000417792	-1.57507	1559000
LPE(14:1e)+Li	LPE	(14:1e)	M+Li	C19 H40 O6 N1 P1 Li1	416.275	416.275	1.69396e-05	0.0406931	1521000
MG(14:0e)+Na	MG	(14:0e)	M+Na	C17 H36 O3 Na1	311.256	311.256	0.000178647	0.573953	2180000
MG(14:1)+H	MG	(14:1)	M+H	C17 H33 O4	301.238	301.237	0.000413543	1.37281	1237000
MG(18:4)+Li	MG	(18:4)	M+Li	C21 H34 O4 Li1	357.262	357.261	0.000363732	1.01811	1294000
MG(19:1)+H	MG	(19:1)	M+H	C22 H43 O4	371.316	371.316	0.000502425	1.35309	31120000
MG(19:1)+Na	MG	(19:1)	M+Na	C22 H42 O4 Na1	393.298	393.298	0.000471885	1.19981	163600000
MG(20:4)+Li	MG	(20:4)	M+Li	C23 H38 O4 Li1	385.293	385.292	0.000457201	1.18663	3925000
MG(22:4)+Li	MG	(22:4)	M+Li	C25 H42 O4 Li1	413.324	413.324	0.000314715	0.761423	5729000
MG(8:1e)+Li	MG	(8:1e)	M+Li	C11 H22 O3 Li1	209.173	209.172	0.00039653	1.8957	88850
MG(9:0)+Na	MG	(9:0)	M+Na	C12 H24 O4 Na1	255.156	255.157	-0.00018347	-0.719047	162100
OAHFA(15:0_36:1)+H	OAHFA	(15:0_36:1)	M+H	C51 H99 O4	775.757	775.754	0.00296653	3.82404	221300
OAHFA(20:0_38:4)+H	OAHFA	(20:0_38:4)	M+H	C58 H107 O4	867.817	867.816	0.00092324	1.06386	489400
PA(24:0_23:0)+NH4	PA	(24:0_23:0)	M+NH4	C50 H103 O8 N1 P1	876.739	876.742	-0.00237147	-2.70487	1314000
PA(28:0_24:0)+Li	PA	(28:0_24:0)	M+Li	C55 H109 O8 N0 P1 Li1	935.803	935.801	0.00166541	1.77966	368100
PC(12:0e_16:0)+H	PC	(12:0e_16:0)	M+H	C36 H75 O7 N1 P1	664.528	664.528	0.00057861	0.870707	3901000
PC(20:4e_24:2)+K	PC	(20:4e_24:2)	M+K	C52 H94 O7 N1 P1 K1	914.638	914.64	-0.00154447	-1.68861	303300
PE(19:1_24:2)+Li	PE	(19:1_24:2)	M+Li	C48 H90 O8 N1 P1 Li1	846.653	846.656	-0.00271885	-3.21129	433400
PE(20:0_24:2)+H	PE	(20:0_24:2)	M+H	C49 H95 O8 N1 P1	856.682	856.679	0.00287523	3.35624	704800
PE(20:3e_23:0)+Na	PE	(20:3e_23:0)	M+Na	C48 H92 O7 N1 P1 Na1	848.649	848.65	-0.000996427	-1.17413	1078000
PE(22:0_23:0)+Li	PE	(22:0_23:0)	M+Li	C50 H100 O8 N1 P1 Li1	880.736	880.734	0.00171353	1.94557	387600
PE(26:0_23:0)+H	PE	(26:0_23:0)	M+H	C54 H109 O8 N1 P1	930.79	930.789	0.00105053	1.12864	241900
PE(28:0_24:2)+Li	PE	(28:0_24:2)	M+Li	C57 H110 O8 N1 P1 Li1	974.813	974.812	0.000664892	0.682071	11540000
PE(31:0_22:6)+K	PE	(31:0_22:6)	M+K	C58 H104 O8 N1 P1 K1	1012.71	1012.71	0.000571008	0.563839	738700
PE(31:1_18:2)+Na	PE	(31:1_18:2)	M+Na	C54 H102 O8 N1 P1 Na1	946.723	946.724	-8.95605e-05	-0.0946005	993700
PE(36:1_18:2)+K	PE	(36:1_18:2)	M+K	C59 H112 O8 N1 P1 K1	1032.77	1032.78	-0.00377871	-3.6588	1413000
PE(36:1_18:2)+Na	PE	(36:1_18:2)	M+Na	C59 H112 O8 N1 P1 Na1	1016.8	1016.8	-0.00432047	-4.24909	1101000
PG(20:0_24:1)+NH4	PG	(20:0_24:1)	M+NH4	C50 H101 O10 N1 P1	906.718	906.716	0.00250053	2.75778	86390
PG(22:0_23:0)+Li	PG	(22:0_23:0)	M+Li	C51 H101 O10 N0 P1 Li1	911.732	911.729	0.00315953	3.46541	118800
PG(26:1_23:0)+H	PG	(26:1_23:0)	M+H	C55 H108 O10 N0 P1	959.769	959.767	0.00111253	1.15916	118300
PG(28:1_24:2)+Li	PG	(28:1_24:2)	M+Li	C58 H109 O10 N0 P1 Li1	1003.79	1003.79	0.00179975	1.79295	271800
PG(30:0_22:6)+Na	PG	(30:0_22:6)	M+Na	C58 H103 O10 N0 P1 Na1	1013.71	1013.72	-0.00335647	-3.31106	165300
PI(16:0_23:0)+NH4	PI	(16:0_23:0)	M+NH4	C48 H97 O13 N1 P1	926.666	926.669	-0.00331734	-3.57987	939800
PI(18:2e_23:0)+NH4	PI	(18:2e_23:0)	M+NH4	C50 H99 O12 N1 P1	936.695	936.69	0.0045717	4.88067	944100
PI(20:1_18:2)+NH4	PI	(20:1_18:2)	M+NH4	C47 H89 O13 N1 P1	906.608	906.607	0.00109053	1.20287	610900
PI(20:4e_11:4)+NH4	PI	(20:4e_11:4)	M+NH4	C40 H67 O12 N1 P1	784.44	784.44	0.00018589	0.236971	4078000
PS(18:2e_23:0)+Li	PS	(18:2e_23:0)	M+Li	C47 H90 O9 N1 P1 Li1	850.647	850.651	-0.00365647	-4.29845	904600
PS(20:0_24:1)+Na	PS	(20:0_24:1)	M+Na	C50 H96 O10 N1 P1 Na1	924.668	924.666	0.00116936	1.26462	457100
PS(31:1_20:4)+Na	PS	(31:1_20:4)	M+Na	C57 H102 O10 N1 P1 Na1	1014.71	1014.71	-0.00147047	-1.44915	779000
PS(31:1_22:6)+Li	PS	(31:1_22:6)	M+Li	C59 H102 O10 N1 P1 Li1	1022.74	1022.74	0.00317773	3.10706	997700
PS(33:0_18:2)+H	PS	(33:0_18:2)	M+H	C57 H109 O10 N1 P1	998.778	998.778	-0.00028547	-0.285819	165900
PS(34:0_20:4)+Li	PS	(34:0_20:4)	M+Li	C60 H110 O10 N1 P1 Li1	1042.8	1042.8	-0.00145331	-1.39366	9233000
SM(d18:2_17:1)+K	SM	(d18:2_17:1)	M+K	C40 H77 O6 N2 P1 K1	751.518	751.515	0.00269069	3.58034	4264000
TG(12:0e_18:1_18:2)+NH4	TG	(12:0e_18:1_18:2)	M+NH4	C51 H98 O5 N1	804.74	804.744	-0.00376147	-4.67414	106600
TG(12:1e_20:4_21:0)+NH4	TG	(12:1e_20:4_21:0)	M+NH4	C56 H104 O5 N1	870.79	870.791	-0.000954575	-1.09622	149900
TG(14:0e_16:0_16:0)+Li	TG	(14:0e_16:0_16:0)	M+Li	C49 H96 O5 Li1	771.741	771.741	-0.00030547	-0.395819	194100
TG(15:0_18:2_20:4)+NH4	TG	(15:0_18:2_20:4)	M+NH4	C56 H100 O6 N1	882.753	882.755	-0.00154047	-1.74507	205800
TG(15:0_22:6_22:6)+NH4	TG	(15:0_22:6_22:6)	M+NH4	C62 H100 O6 N1	954.756	954.755	0.00100097	1.04841	1286000
TG(15:0_8:0_22:6)+NH4	TG	(15:0_8:0_22:6)	M+NH4	C48 H84 O6 N1	770.633	770.629	0.0034667	4.49851	790000
TG(16:0_16:0_17:0)+Na	TG	(16:0_16:0_17:0)	M+Na	C52 H100 O6 Na1	843.744	843.741	0.0031142	3.69092	239100
TG(16:0e_18:2_22:6)+H	TG	(16:0e_18:2_22:6)	M+H	C59 H101 O5	889.768	889.764	0.00412353	4.63438	118100
TG(16:1_12:0_18:2)+NH4	TG	(16:1_12:0_18:2)	M+NH4	C49 H92 O6 N1	790.691	790.692	-0.0006541	-0.82725	1527000
TG(16:2e_10:4_11:4)+H	TG	(16:2e_10:4_11:4)	M+H	C40 H59 O5	619.439	619.436	0.00291075	4.69901	1748000
TG(18:0e_18:2_18:2)+Na	TG	(18:0e_18:2_18:2)	M+Na	C57 H104 O5 Na1	891.78	891.778	0.00268068	3.00598	182900
TG(19:0_18:2_18:2)+NH4	TG	(19:0_18:2_18:2)	M+NH4	C58 H108 O6 N1	914.813	914.817	-0.00429147	-4.69109	806000
TG(22:6_13:0_22:6)+Na	TG	(22:6_13:0_22:6)	M+Na	C60 H92 O6 Na1	931.682	931.679	0.00352853	3.78727	125900
TG(4:0_10:0_11:2)+Li	TG	(4:0_10:0_11:2)	M+Li	C28 H48 O6 Li1	487.36	487.361	-0.00084647	-1.73685	11380000
TG(4:0_10:1_11:4)+H	TG	(4:0_10:1_11:4)	M+H	C28 H43 O6	475.306	475.305	0.000774237	1.62892	2039000
TG(4:0_6:0_11:0)+H	TG	(4:0_6:0_11:0)	M+H	C24 H45 O6	429.319	429.321	-0.00202947	-4.72718	1077000
TG(4:0_6:0_12:0)+H	TG	(4:0_6:0_12:0)	M+H	C25 H47 O6	443.335	443.337	-0.00213747	-4.82134	9478000
TG(4:0_6:0_14:2)+Li	TG	(4:0_6:0_14:2)	M+Li	C27 H46 O6 Li1	473.345	473.345	0.000138502	0.292602	6405000
TG(4:0_8:0_11:2)+Li	TG	(4:0_8:0_11:2)	M+Li	C26 H44 O6 Li1	459.329	459.329	0.00012653	0.275466	774800

## Sheet: CellExtraction_10
LipidIon	Class	FattyAcid	Ion	Formula	ObsMz	CalcMz	Delta(Da)	Delta(PPM)	Area
Cer(m17:0_21:5)+NH4	Cer	(m17:0_21:5)	M+NH4	C38 H71 O2 N2	587.548	587.551	-0.00269976	-4.59496	6902000
DG(10:1e_11:4)+H	DG	(10:1e_11:4)	M+H	C24 H39 O4	391.284	391.284	0.00011253	0.287591	4986000
DG(10:1e_11:4)+Na	DG	(10:1e_11:4)	M+Na	C24 H38 O4 Na1	413.266	413.266	0.000132222	0.319945	19750000
DG(12:0e_11:2)+Na	DG	(12:0e_11:2)	M+Na	C26 H48 O4 Na1	447.346	447.344	0.001101	2.46119	6482000
DG(12:1e_11:4)+Na	DG	(12:1e_11:4)	M+Na	C26 H42 O4 Na1	441.298	441.298	7.453e-05	0.168888	31290000
DG(14:1e_11:4)+H	DG	(14:1e_11:4)	M+H	C28 H47 O4	447.346	447.347	-0.000535371	-1.19677	17540000
DG(14:1e_11:4)+Na	DG	(14:1e_11:4)	M+Na	C28 H46 O4 Na1	469.329	469.329	0.00019353	0.412354	107400000
DG(4:0_18:3)+Li	DG	(4:0_18:3)	M+Li	C25 H42 O5 Li1	429.319	429.319	0.00055653	1.29631	609100
DG(8:0e_11:2)+Na	DG	(8:0e_11:2)	M+Na	C22 H40 O4 Na1	391.283	391.282	0.000649638	1.66028	8997000
MG(14:0e)+Na	MG	(14:0e)	M+Na	C17 H36 O3 Na1	311.254	311.256	-0.00122047	-3.92113	20390
MG(19:1)+H	MG	(19:1)	M+H	C22 H43 O4	371.316	371.316	0.00047453	1.27797	2443000
MG(19:1)+Na	MG	(19:1)	M+Na	C22 H42 O4 Na1	393.298	393.298	0.00027369	0.695885	9133000
MG(22:4)+Li	MG	(22:4)	M+Li	C25 H42 O4 Li1	413.324	413.324	-1.06403e-05	-0.0257433	2984000
MG(9:0)+Na	MG	(9:0)	M+Na	C12 H24 O4 Na1	255.156	255.157	-0.00043747	-1.71451	218800

[truncated: 20 more sheets: CellExtraction_11, CellExtraction_12, CellExtraction_13, CellExtraction_14, CellExtraction_15, CellExtraction_16, CellExtraction_17, CellExtraction_18, CellExtraction_19, CellExtraction_20, CellExtraction_21, CellExtraction_22, CellExtraction_23, CellExtraction_24, CellExtraction_25, CellExtraction_26, CellExtraction_27, CellExtraction_28, CellExtraction_29, CellExtraction_30]
